# Supplementary material for: Integrated Analysis of Long Non-Coding RNA and mRNA to Reveal Putative Candidate Genes Associated with Backfat Quality in Beijing Black Pig
Source: MDPI journal article supplement (doi:10.3390/foods11223654), 2022-11-15
Supplement: s1 [file s1]

A

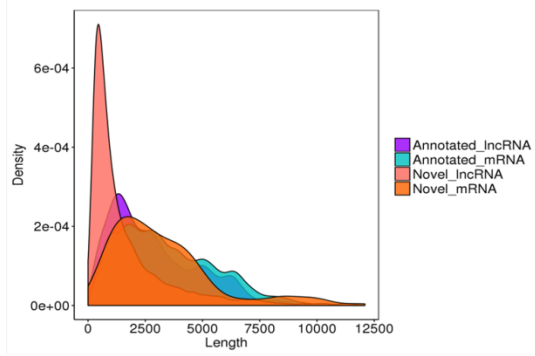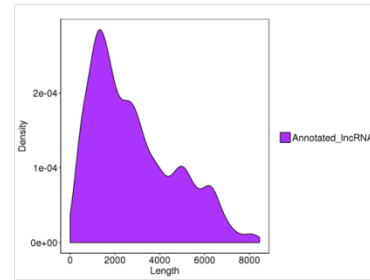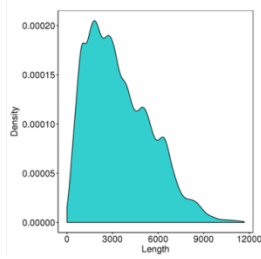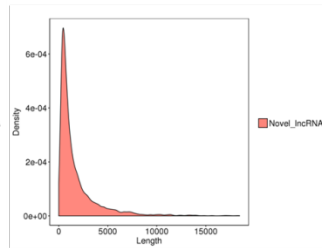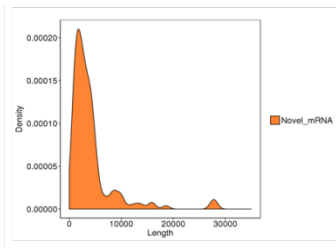

B

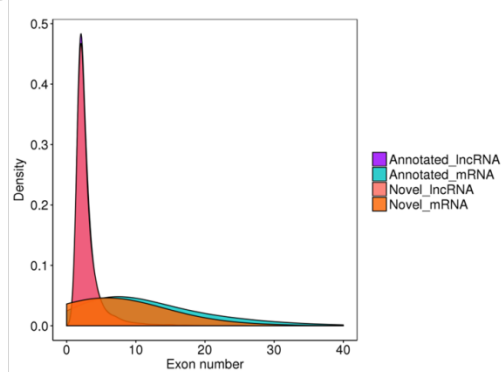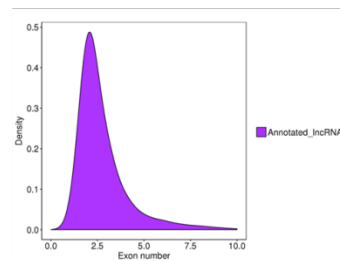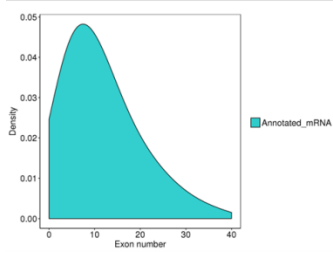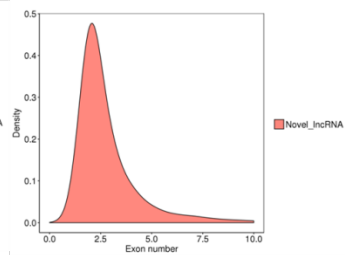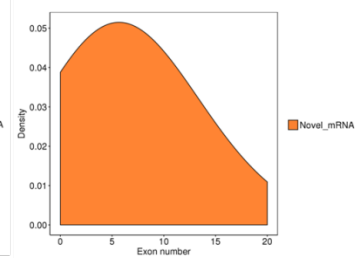

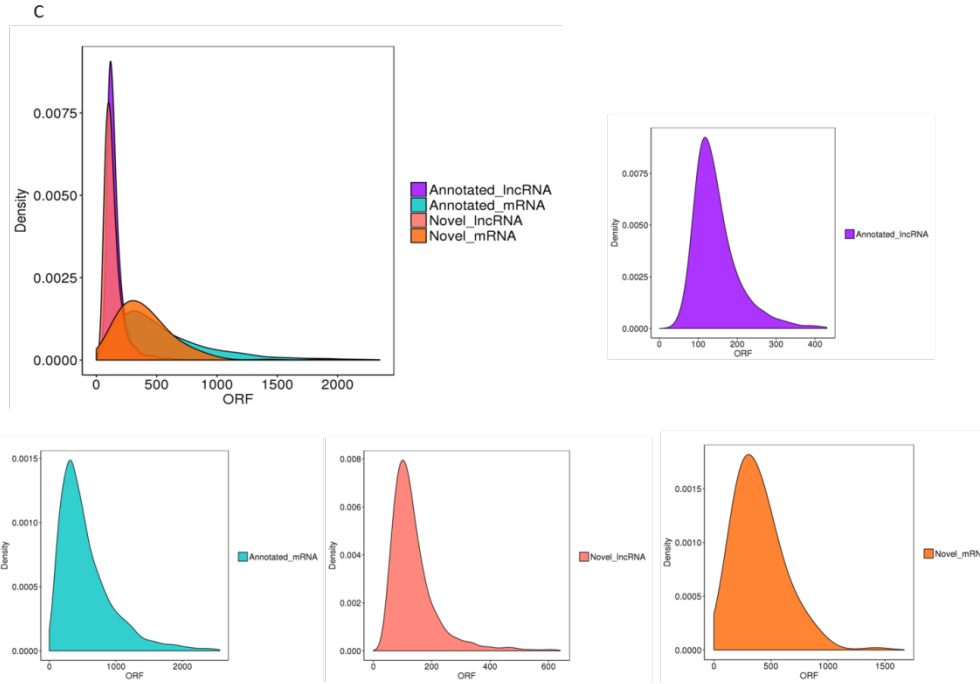

**Figure S1.** Genomic characteristics of mRNAs and lncRNAs in pig backfat **(A)** Length distribution of annotated mRNAs, annotated lncRNAs, novel mRNAs and novel lncRNAs; **(B)** Exon number distribution of annotated mRNAs, annotated lncRNAs, novel mRNAs and novel lncRNAs; **(C)** ORF length distribution of annotated mRNAs, annotated lncRNAs, novel mRNAs and novel lncRNAs.
