# Supplementary material for: Integrated Analysis of Long Non-Coding RNA and mRNA to Reveal Putative Candidate Genes Associated with Backfat Quality in Beijing Black Pig
Source: Foods. 2022 Nov 15;11(22):3654. doi: 10.3390/foods11223654 (PMC9689697; doi:10.3390/foods11223654)
Supplement: Supplementary file 1 [file foods-11-03654-s001.zip › Table S1.xlsx]

## Sheet: Sheet1
Gene name	Primer sequence (5'-3’)	Product Size (bp)
ME1	F:TTCAAGGAACGGCATCTGT	199
	R:GAGTCAACCAACCATATCT
SCD	F:ACACCCAGCCGTCAAAGAG	203
	R:CGATGGCGTAACGAAGAAA
PPARG	F:CTGACCAAAGCAAAGGCGA	189
	R:CACGGAGCGAAACTGACAC
ACLY	F:AAACCGCAATAGCCAAGAACC	200
	R:TCCTCGCTCGTCGCAGATG
ACE2	F:GAGAGGGGATTATGAAGTGACA	190
	R:AAGCAAATGAGCAGGGAGG
TCONS_00012871	F:GAATGGGTTAACAGATGGG	179
	R:TTTGGGAGATAGTTGAGGTC
TCONS_00224182	F:TTCTTGGGCGTTAGTTTGTCT	200
	R:AATGGTTTCTTTCCGGGTCT
TCONS_00250121	F:TCTGCTCCTGCTCCCAAAA	177
	R:CGATGCGCTCGAAGATGTC
TCONS_00208232	F:CAGGAAGAGGGGGCATCAA	194
	R:ACAGGCAAGCAGGGCAAGG
TCONS_00148627	F:TGGCACCTTACCTCCTCACGC	198
	R:TACCAGCCGCCCCCTTTTT
TCONS_00282800	F:CTATGGGTTGAATTGGAGC	204
	R:TCGGTAATGAATCTGACTAGTATC
GAPDH	F:GGGCATGAACCATGAGAAGT	200
	R:AAGCAGGGATGATGTTCTGG
