# Supplementary material for: Integrated Analysis of Long Non-Coding RNA and mRNA to Reveal Putative Candidate Genes Associated with Backfat Quality in Beijing Black Pig
Source: Foods. 2022 Nov 15;11(22):3654. doi: 10.3390/foods11223654 (PMC9689697; doi:10.3390/foods11223654)
Supplement: Supplementary file 1 [file foods-11-03654-s001.zip › Table S2.xlsx]

## Sheet: Sheet1
Sample_name	Raw_reads	Clean_reads	Q20(%)	Q30(%)	GC_content(%)
BH_1	89011318	87747732	96.75	91.9	61.27
BH_2	87328194	85789924	96.71	91.9	62.37
BH_3	104972886	103173100	96.95	92.27	58.84
BL_1	83616388	82125588	96.36	90.73	56.87
BL_2	99259816	97698182	96.86	92	59.54
BL_3	101744168	100443420	96.95	92.17	57.42
