# Supplementary material for: Integrated Analysis of Long Non-Coding RNA and mRNA to Reveal Putative Candidate Genes Associated with Backfat Quality in Beijing Black Pig
Source: Foods. 2022 Nov 15;11(22):3654. doi: 10.3390/foods11223654 (PMC9689697; doi:10.3390/foods11223654)
Supplement: Supplementary file 1 [file foods-11-03654-s001.zip › Table S3.xlsx]

## Sheet: Sheet1
Sample name	BH_1	BH_2	BH_3	BL_1	BL_2	BL_3
Total reads	87747732	85789924	103173100	82125588	97698182	100443420
Total mapped	80738940 (92.01%)	77049513 (89.81%)	95839960 (92.89%)	75930763 (92.46%)	90188807 (92.31%)	92896855（92.49%）
						-0.9249
Multiple mapped	14448964 (16.47%)	18924932 (22.06%)	15591755 (15.11%)	14242491 (17.34%)	21264655 (21.77%)	16680256（16.61%）
						-0.1661
Uniquely mapped	66289976 (75.55%)	58124581 (67.75%)	80248205 (77.78%)	61688272 (75.11%)	68924152 (70.55%)	76216599（75.88%）
						-0.7588
