# Supplementary material for: Integrated Analysis of Long Non-Coding RNA and mRNA to Reveal Putative Candidate Genes Associated with Backfat Quality in Beijing Black Pig
Source: Foods. 2022 Nov 15;11(22):3654. doi: 10.3390/foods11223654 (PMC9689697; doi:10.3390/foods11223654)
Supplement: Supplementary file 1 [file foods-11-03654-s001.zip › Table S4.xlsx]

## Sheet: Table S4
	Gene	log2FoldChange	padj
ENSSSCG00000047083	H2BC21	8.82406	2.11e-28
ENSSSCG00000008875	RXFP1	11.8737	1.2e-16
ENSSSCG00000010617	SORCS3	-11.5621	7.05e-15
ENSSSCG00000035621	GABRB1	-11.1411	1.63e-13
ENSSSCG00000046241	0	-12.152	8.4e-13
ENSSSCG00000010554	SCD	-2.51864	9.44e-13
ENSSSCG00000003797	DIRAS3	-3.99397	5.29e-12
ENSSSCG00000000528	PKP2	-3.3574	3.73e-11
ENSSSCG00000043963	0	-10.7424	2.2e-10
ENSSSCG00000010535	HPSE2	3.28734	8e-10
ENSSSCG00000044445	0	-10.618	9.14e-10
ENSSSCG00000030209	MFNG	-1.24389	9.14e-10
ENSSSCG00000026260	ATP13A5	-10.1342	1.11e-09
ENSSSCG00000005316	0	1.28864	1.32e-09
ENSSSCG00000021176	LPXN	-2.58558	2.01e-09
ENSSSCG00000005269	TRPM6	1.64501	3.36e-09
ENSSSCG00000036785	MTMR7	-2.3178	4.07e-09
ENSSSCG00000011625	CHST13	-2.60109	8.56e-09
ENSSSCG00000014221	LVRN	1.57107	1.09e-08
ENSSSCG00000047560	0	-9.76627	1.16e-08
ENSSSCG00000026478	PADI2	-3.49498	3.47e-08
ENSSSCG00000010232	LRRTM3	-9.50599	4.73e-08
ENSSSCG00000032129	COX7B	-1.18212	5.57e-08
ENSSSCG00000034495	SNTG1	-9.59444	7.85e-08
ENSSSCG00000008624	LPIN1	1.02756	1.13e-07
ENSSSCG00000015795	0	-3.11767	1.26e-07
ENSSSCG00000034266	CACNA1H	1.97277	1.39e-07
ENSSSCG00000043223	0	-10.3659	2e-07
ENSSSCG00000003914	PRDX1	-1.30907	2.61e-07
ENSSSCG00000011942	CD47	1.23484	5.79e-07
ENSSSCG00000040770	CA1	-9.87444	6.79e-07
ENSSSCG00000004225	TPD52L1	9.29642	6.79e-07
ENSSSCG00000032332	SOCS4	-1.27471	6.88e-07
ENSSSCG00000001444	0	-9.00582	7.74e-07
ENSSSCG00000016384	0	-9.33627	9.19e-07
ENSSSCG00000007979	LUC7L	0.805284	1.86e-06
ENSSSCG00000005167	SLC24A2	-3.83742	1.9e-06
ENSSSCG00000009216	SPP1	-4.23045	1.98e-06
ENSSSCG00000010494	SORBS1	-1.55518	1.99e-06
ENSSSCG00000031307	0	2.21652	2.76e-06
ENSSSCG00000015903	SLC38A11	-9.37306	2.99e-06
ENSSSCG00000041625	REELD1	2.1255	3.4e-06
ENSSSCG00000001840	KIF7	0.93506	3.4e-06
ENSSSCG00000004075	RGS17	-4.6946	3.48e-06
ENSSSCG00000036924	PSMA4	-0.975573	3.76e-06
ENSSSCG00000000029	SCUBE1	1.65291	3.76e-06
ENSSSCG00000034726	KCNH5	-8.78178	3.93e-06
ENSSSCG00000003064	ETHE1	-1.0939	4.71e-06
ENSSSCG00000011999	CADM2	-1.50763	4.94e-06
ENSSSCG00000016256	SPHKAP	-8.86256	4.95e-06
ENSSSCG00000016110	KIAA2012	-9.19245	6.4e-06
ENSSSCG00000000916	LUM	-1.81094	6.4e-06
ENSSSCG00000035863	PLIN2	-1.37371	6.4e-06
ENSSSCG00000006141	CA3	-2.50832	7.04e-06
ENSSSCG00000029392	HUNK	2.3033	7.09e-06
ENSSSCG00000016153	UNC80	-9.71412	7.38e-06
ENSSSCG00000005199	GLDC	-9.24011	8.51e-06
ENSSSCG00000024149	ELOVL5	-1.19103	1.07e-05
ENSSSCG00000045652	0	-1.42836	1.43e-05
ENSSSCG00000025986	EDARADD	-9.1634	1.43e-05
ENSSSCG00000026594	0	-8.82232	1.45e-05
ENSSSCG00000012138	ACE2	-1.58648	1.47e-05
ENSSSCG00000024019	0	-1.13647	1.51e-05
ENSSSCG00000004480	COX7A2	-1.03294	1.51e-05
ENSSSCG00000034220	0	-1.49798	1.56e-05
ENSSSCG00000025644	0	-2.73652	1.63e-05
ENSSSCG00000022945	UCHL1	-2.4111	1.65e-05
ENSSSCG00000015628	SPATA48	-8.97601	1.68e-05
ENSSSCG00000015926	ABCB11	-8.60021	1.7e-05
ENSSSCG00000012676	MBNL3	2.15039	1.81e-05
ENSSSCG00000011078	ARMC3	-8.68969	1.81e-05
ENSSSCG00000011543	LHFPL4	-8.66289	2.05e-05
ENSSSCG00000006079	RIDA	-1.00003	2.19e-05
ENSSSCG00000029778	SPATA17	2.3713	2.2e-05
ENSSSCG00000017421	ACLY	-2.41545	2.27e-05
ENSSSCG00000024263	SERF2	-3.05539	2.5e-05
ENSSSCG00000012440	PGK1	-1.17448	2.5e-05
ENSSSCG00000002632	SLC28A1	-8.72626	2.6e-05
ENSSSCG00000001463	PSMB9	1.10756	2.64e-05
ENSSSCG00000032902	KLK7	-8.77423	3.5e-05
ENSSSCG00000009176	LAMTOR3	1.71081	4.18e-05
ENSSSCG00000008959	CXCL2	-1.13601	4.2e-05
ENSSSCG00000009523	0	-0.910701	4.7e-05
ENSSSCG00000029938	0	-8.61348	6.71e-05
ENSSSCG00000017498	PPP1R1B	1.66307	6.79e-05
ENSSSCG00000016156	ACADL	-0.865026	7.17e-05
ENSSSCG00000032849	MLPH	2.62319	7.46e-05
ENSSSCG00000038442	TMLHE	-0.746269	7.87e-05
ENSSSCG00000029331	PALLD	0.77803	7.91e-05
ENSSSCG00000030371	SERPINA3-2	-8.76805	8e-05
ENSSSCG00000028047	DTNA	1.51536	8.54e-05
ENSSSCG00000016239	NYAP2	-3.04343	0.000106856
ENSSSCG00000012857	CARS1	0.997646	0.00012507
ENSSSCG00000002478	SERPINA12	-8.58433	0.000129991
ENSSSCG00000039324	FLII	0.68059	0.000146989
ENSSSCG00000026527	HCN1	-2.54912	0.000157278
ENSSSCG00000023215	MAOB	2.29438	0.000157278
ENSSSCG00000016671	ITPRID1	-9.00017	0.000163256
ENSSSCG00000004672	GATM	1.57021	0.000169707
ENSSSCG00000017693	AATF	-1.4495	0.000200417
ENSSSCG00000025108	G6PD	-1.18952	0.000205257
ENSSSCG00000015862	LIMS2	1.12143	0.000236071
ENSSSCG00000008487	ATL2	-0.975432	0.000260661
ENSSSCG00000007286	ACSS2	-1.71678	0.000271146
ENSSSCG00000024752	ALDH4A1	-1.13147	0.000271146
ENSSSCG00000022256	DEPP1	-1.01262	0.000275108
ENSSSCG00000025281	ARL6IP1	-0.988998	0.000290738
ENSSSCG00000014219	CDO1	-0.669324	0.000302581
ENSSSCG00000029311	MYPN	-9.00556	0.000312244
ENSSSCG00000028620	ABCD3	-0.872351	0.000315444
ENSSSCG00000012766	BGN	-1.23084	0.000376249
ENSSSCG00000040296	EHHADH	-0.826445	0.000376249
ENSSSCG00000012944	PELI3	1.11524	0.000376249
ENSSSCG00000033822	THRSP	-2.18785	0.000393027
ENSSSCG00000016107	C2CD6	-2.1478	0.000397265
ENSSSCG00000011925	CD200R1	-2.01165	0.000410288
ENSSSCG00000011689	PLOD2	-0.781949	0.000410288
ENSSSCG00000006866	DBT	-0.777533	0.000410288
ENSSSCG00000004662	SLC24A5	-8.64705	0.000410288
ENSSSCG00000017624	CUEDC1	0.932205	0.000410288
ENSSSCG00000010903	LHX9	-8.14826	0.000410428
ENSSSCG00000000854	0	-9.06122	0.000432034
ENSSSCG00000004454	ME1	-1.71612	0.000432034
ENSSSCG00000013490	PIP5K1C	1.09374	0.000442316
ENSSSCG00000011764	0	-0.972683	0.000476601
ENSSSCG00000024424	FAM91A1	-0.805068	0.000496888
ENSSSCG00000033199	TAFA4	-1.38491	0.000504166
ENSSSCG00000003867	TXNDC12	-0.846211	0.000507963
ENSSSCG00000037987	MS4A10	-2.45108	0.00056812
ENSSSCG00000031944	SLC17A4	-8.01213	0.00056812
ENSSSCG00000008927	TMPRSS11A	-8.07053	0.00056812
ENSSSCG00000000405	0	-1.36329	0.00056812
ENSSSCG00000023393	ZBBX	-8.39058	0.00056812
ENSSSCG00000039494	NDUFC2	-1.87153	0.000606859
ENSSSCG00000005986	FAM83A	-8.24904	0.000617903
ENSSSCG00000006979	MSR1	-2.61606	0.000617903
ENSSSCG00000012101	0	-2.01732	0.000649496
ENSSSCG00000020970	IL6	-1.53987	0.000650748
ENSSSCG00000036956	SOCS3	-1.44841	0.000650748
ENSSSCG00000006771	SLC16A1	-0.90235	0.000662753
ENSSSCG00000006569	SLC27A3	1.15615	0.000721236
ENSSSCG00000037305	TMEM33	-0.736339	0.000747783
ENSSSCG00000010345	GHITM	-1.11696	0.000769248
ENSSSCG00000015489	SLC9C2	-8.79839	0.000776381
ENSSSCG00000002298	ZFYVE26	1.12684	0.000832068
ENSSSCG00000040795	0	-8.19339	0.000855429
ENSSSCG00000042157	0	-1.89897	0.000884446
ENSSSCG00000004499	ATP5F1A	-1.18799	0.000892607
ENSSSCG00000037676	KAZN	1.60805	0.000901794
ENSSSCG00000016635	CAV2	-0.801742	0.000909665
ENSSSCG00000029066	IDI1	-1.52956	0.000989262
ENSSSCG00000017932	ASGR2	-8.31444	0.000992696
ENSSSCG00000040275	HEBP1	-0.993407	0.0010827
ENSSSCG00000012963	SART1	0.969333	0.00115783
ENSSSCG00000005067	CCDC198	-8.31261	0.00116384
ENSSSCG00000038423	GLA	-1.01118	0.00119744
ENSSSCG00000010447	ACTA2	1.25513	0.00120655
ENSSSCG00000009941	SVOP	-8.96252	0.00138893
ENSSSCG00000013339	ANO3	-0.624979	0.00144087
ENSSSCG00000010517	PGAM1	-1.04197	0.00150216
ENSSSCG00000003230	0	3.28503	0.00155999
ENSSSCG00000021310	LIN9	-0.883486	0.00163772
ENSSSCG00000032153	C19orf12	-1.22469	0.00163876
ENSSSCG00000048009	0	-7.96721	0.00165383
ENSSSCG00000022126	EGFR	0.769946	0.00165383
ENSSSCG00000016100	NDUFB3	-1.29707	0.00166361
ENSSSCG00000040681	FABP4	-0.802828	0.00166361
ENSSSCG00000026061	0	-8.38178	0.00178126
ENSSSCG00000002857	TDRD12	1.88476	0.00184558
ENSSSCG00000037697	MGP	-0.80894	0.00188439
ENSSSCG00000034102	DGAT2	-1.02785	0.00196693
ENSSSCG00000006203	COPS5	-0.693654	0.00198213
ENSSSCG00000011129	ITIH5	1.11674	0.00205031
ENSSSCG00000023304	SRRM2	0.853482	0.00209562
ENSSSCG00000012000	GBE1	-1.07093	0.00214669
ENSSSCG00000015933	FASTKD1	-0.664454	0.00219097
ENSSSCG00000015034	SDHD	-1.0947	0.00248923
ENSSSCG00000025881	PDHB	-1.63129	0.00251761
ENSSSCG00000016497	DENND2A	0.791497	0.00251761
ENSSSCG00000038824	FRRS1L	1.03889	0.00251761
ENSSSCG00000009466	UCHL3	-0.61964	0.00252606
ENSSSCG00000037120	TK1	-2.25488	0.00254924
ENSSSCG00000005946	CCN4	-2.02344	0.0025978
ENSSSCG00000027378	SH3PXD2B	1.41305	0.00261402
ENSSSCG00000008392	BCL11A	-8.0585	0.00262821
ENSSSCG00000023296	CENPE	-2.56761	0.00265856
ENSSSCG00000009270	IFT88	1.30756	0.00278194
ENSSSCG00000022011	NMI	0.819035	0.00278309
ENSSSCG00000015550	RGS16	-1.57683	0.00280324
ENSSSCG00000013736	PRDX2	-0.854407	0.00294966
ENSSSCG00000003998	ZNF274	1.03389	0.0030426
ENSSSCG00000031452	C14orf93	-0.647635	0.00308612
ENSSSCG00000047840	0	0.965883	0.00309784
ENSSSCG00000006304	MPC2	-1.49191	0.0031846
ENSSSCG00000009851	0	-0.95337	0.00319217
ENSSSCG00000007436	MMP9	-3.31776	0.00330267
ENSSSCG00000039651	SLC2A5	-2.2432	0.00330267
ENSSSCG00000015136	UBASH3B	-1.54332	0.00337304
ENSSSCG00000025751	MDH1	-0.98138	0.00337304
ENSSSCG00000016412	LMBR1	0.813877	0.00337304
ENSSSCG00000032957	PTPN23	0.714914	0.00340888
ENSSSCG00000023886	RPA3	-0.958317	0.00340888
ENSSSCG00000039188	AK8	0.97882	0.00344841
ENSSSCG00000031518	STARD4	-0.799344	0.00360488
ENSSSCG00000004216	ECHDC1	-1.55106	0.00360488
ENSSSCG00000036236	ELOVL6	-1.38663	0.00360488
ENSSSCG00000040403	NANOG	7.76258	0.00370499
ENSSSCG00000026294	GMFB	-0.720733	0.00394857
ENSSSCG00000017694	ACACA	-1.65499	0.00396867
ENSSSCG00000035789	0	-3.11671	0.00419518
ENSSSCG00000027307	NDUFA11	-1.10898	0.00425765
ENSSSCG00000011163	DIP2C	0.750004	0.00430378
ENSSSCG00000040714	RSPH6A	-7.88991	0.0043154
ENSSSCG00000031733	AKAP12	0.768929	0.00447811
ENSSSCG00000016620	TSPAN12	-1.25239	0.00447811
ENSSSCG00000039985	CES1	-1.49337	0.00456668
ENSSSCG00000026414	0	-0.732982	0.00463747
ENSSSCG00000035221	ENTR1	1.29097	0.00465667
ENSSSCG00000036046	0	-7.80253	0.00465667
ENSSSCG00000000732	CRACR2A	0.906341	0.00465667
ENSSSCG00000027275	HHLA2	1.46185	0.00465667
ENSSSCG00000014038	FAM193B	0.748113	0.00472324
ENSSSCG00000008533	0	-9.78815	0.00489313
ENSSSCG00000028517	SC5D	-1.23182	0.00531319
ENSSSCG00000037360	CST3	-1.1034	0.00533899
ENSSSCG00000002729	VAC14	0.983581	0.00533964
ENSSSCG00000023204	AXIN1	0.782858	0.00540421
ENSSSCG00000005502	ASTN2	-1.45976	0.00557265
ENSSSCG00000007287	GSS	-1.18902	0.00557265
ENSSSCG00000010446	STAMBPL1	1.18932	0.00568192
ENSSSCG00000010248	KIFBP	-0.985734	0.00590589
ENSSSCG00000022525	ARHGEF5	-7.98942	0.00596674
ENSSSCG00000009177	DNAJB14	-0.644638	0.00596674
ENSSSCG00000014310	CXCL14	-1.63316	0.00596674
ENSSSCG00000002998	SNRPA	-0.844031	0.00597521
ENSSSCG00000030801	0	1.04698	0.00611034
ENSSSCG00000016581	CALU	-2.1123	0.00620416
ENSSSCG00000000859	PARPBP	-1.55184	0.00630294
ENSSSCG00000004643	SLC27A2	-4.36416	0.00660754
ENSSSCG00000004615	WDR72	-9.61487	0.00680783
ENSSSCG00000024761	SNX13	-0.591323	0.00689635
ENSSSCG00000014318	TRPC7	-9.79353	0.0069515
ENSSSCG00000017311	MAPT	-0.920153	0.00703463
XLOC_099791	#N/A	0.609816	0.00733858
ENSSSCG00000029419	SCN11A	-7.62518	0.0074005
ENSSSCG00000026985	SNAP25	-9.53791	0.00748026
ENSSSCG00000038475	0	-1.19587	0.00748026
ENSSSCG00000006461	ARHGEF11	0.657849	0.00749951
ENSSSCG00000037497	0	-9.59754	0.00755522
ENSSSCG00000015353	SCIN	-2.12687	0.00768991
ENSSSCG00000002523	CDC42BPB	0.741036	0.00770399
ENSSSCG00000029449	0	-1.99851	0.00775481
ENSSSCG00000031581	0	-5.68953	0.00775481
ENSSSCG00000002712	LDHD	-1.3207	0.00791703
ENSSSCG00000013436	0	-0.845966	0.00791703
XLOC_037406	#N/A	9.78878	0.00818433
ENSSSCG00000011579	PPARG	0.58446	0.00839578
ENSSSCG00000016217	DNAJB2	0.929485	0.00849136
ENSSSCG00000028056	ZFP36	-0.955394	0.0085509
ENSSSCG00000001657	CUL7	1.15909	0.00855486
ENSSSCG00000006325	MGST3	-1.03848	0.00868887
ENSSSCG00000022351	GSTO1	-0.9787	0.00970648
ENSSSCG00000024313	NDUFA4	-1.06289	0.00977686
ENSSSCG00000023178	BATF2	2.82641	0.00992542
ENSSSCG00000017584	PPP1R9B	0.628528	0.00996238
ENSSSCG00000036297	0	-1.27052	0.00999459
ENSSSCG00000044903	0	-7.73452	0.0101015
ENSSSCG00000017473	TOP2A	-2.12109	0.0102935
ENSSSCG00000042365	0	1.50133	0.0104248
ENSSSCG00000010370	0	-1.3384	0.0104313
ENSSSCG00000015030	DLAT	-1.30653	0.0104313
ENSSSCG00000002307	ERH	-0.600375	0.0106172
ENSSSCG00000006719	0	2.23548	0.0107159
ENSSSCG00000039198	PCGF2	0.783067	0.0109431
ENSSSCG00000013298	PDHX	-0.720483	0.0111243
ENSSSCG00000022828	PNN	0.818707	0.0112516
ENSSSCG00000021880	MXRA8	0.806418	0.0112516
ENSSSCG00000016627	ASZ1	-9.79301	0.0112516
ENSSSCG00000001520	LEMD2	0.729818	0.0112516
ENSSSCG00000001049	HIVEP1	0.74191	0.0112516
ENSSSCG00000023857	0	0.778229	0.0115332
ENSSSCG00000008339	GFPT1	-0.647439	0.0115655
ENSSSCG00000005164	HACD4	-1.22444	0.0121682
ENSSSCG00000011034	ST8SIA6	9.36645	0.0121769
ENSSSCG00000000577	GYS2	-2.24006	0.0122125
ENSSSCG00000021562	PLXNA4	1.42539	0.0122605
ENSSSCG00000011103	PARD3	0.598269	0.0122605
ENSSSCG00000031773	C4orf3	-1.00952	0.0122685
ENSSSCG00000009932	MMAB	-1.11006	0.0124208
ENSSSCG00000013522	SAFB	0.705382	0.0124529
ENSSSCG00000012326	RIBC1	-0.968086	0.0127199
ENSSSCG00000013511	HDGFL2	0.663342	0.0133189
ENSSSCG00000005193	TYRP1	-7.43613	0.0133192
ENSSSCG00000000220	POU6F1	1.09187	0.0134603
ENSSSCG00000046700	0	0.792961	0.0135549
ENSSSCG00000009823	VPS29	-0.737394	0.0135846
ENSSSCG00000008241	0	0.94146	0.0136329
ENSSSCG00000005928	MROH5	-7.47213	0.0137663
ENSSSCG00000021093	C10orf67	-9.34978	0.0138358
ENSSSCG00000002829	MMP2	0.750229	0.013875
ENSSSCG00000001846	WDR93	0.677609	0.0140944
ENSSSCG00000034753	FAM177A1	1.52717	0.0145777
ENSSSCG00000002907	0	-1.07622	0.0145777
ENSSSCG00000040457	EPN2	1.05272	0.0145777
ENSSSCG00000028204	TREH	-2.88646	0.0145777
ENSSSCG00000015917	XIRP2	-4.31705	0.0148852
ENSSSCG00000030271	GSTO2	3.02125	0.0149562
ENSSSCG00000034919	GDA	-9.23751	0.0151495
ENSSSCG00000016737	0	-0.643543	0.015192
ENSSSCG00000005212	PLGRKT	-0.867496	0.0152062
ENSSSCG00000036758	HSPA12A	-1.2794	0.0152062
ENSSSCG00000031847	RBM28	0.954897	0.0152266
ENSSSCG00000008769	0	-2.86938	0.0154454
ENSSSCG00000035214	0	-0.762586	0.0154454
ENSSSCG00000012164	CNKSR2	-1.62423	0.0154454
ENSSSCG00000039541	ANKRD11	0.944677	0.0155254
ENSSSCG00000001430	ATF6B	0.727013	0.0155503
ENSSSCG00000001910	ISLR	-1.27331	0.0155503
ENSSSCG00000006166	NDUFB8	-0.898973	0.0157195
ENSSSCG00000000292	0	1.46013	0.0159908
ENSSSCG00000028479	0	-0.827309	0.0159908
ENSSSCG00000039662	MRPL51	-0.767411	0.0162059
ENSSSCG00000034373	TNRC6C	0.79221	0.0164001
ENSSSCG00000001487	KLHL31	-1.30845	0.0164172
ENSSSCG00000009873	DTX1	-1.0926	0.0164392
ENSSSCG00000030577	PBDC1	-0.731306	0.0164555
ENSSSCG00000010994	NFX1	0.765782	0.0164944
ENSSSCG00000017578	ITGA3	0.913301	0.0164944
ENSSSCG00000010682	PRDX3	-0.991695	0.0168148
XLOC_099487	#N/A	1.40621	0.0168148
ENSSSCG00000009591	AUH	0.613436	0.0168265
ENSSSCG00000013294	LDLRAD3	1.41821	0.0168516
ENSSSCG00000007951	CREBBP	0.595676	0.0170522
ENSSSCG00000014289	UQCRQ	-1.02587	0.0170542
ENSSSCG00000004344	MMS22L	-0.697204	0.0175696
ENSSSCG00000010067	MIF	-0.767406	0.0175696
ENSSSCG00000006933	CLCA1	1.6246	0.0176538
ENSSSCG00000042867	0	-7.29312	0.0177238
ENSSSCG00000005753	CAMSAP1	1.10749	0.0177684
ENSSSCG00000037782	MRPS28	-0.806897	0.0179938
ENSSSCG00000003653	NDUFS5	-0.823934	0.0179942
ENSSSCG00000016892	FST	0.998699	0.0179942
ENSSSCG00000013524	MICOS13	-0.766681	0.0179942
ENSSSCG00000037463	MRPS36	-0.780623	0.0180309
ENSSSCG00000015015	ARHGAP20	0.798306	0.0180309
ENSSSCG00000015864	MYO7B	2.11333	0.0180309
ENSSSCG00000027401	OPRD1	-2.702	0.0183116
ENSSSCG00000028481	0	0.757772	0.0183699
ENSSSCG00000040416	0	0.777083	0.0183699
ENSSSCG00000041129	0	-1.23521	0.0183699
ENSSSCG00000007763	BCKDK	-0.809452	0.0183699
ENSSSCG00000002040	MRPL52	-0.796692	0.0185502
ENSSSCG00000035967	ZC3H18	0.884827	0.0185593
ENSSSCG00000031462	0	0.61829	0.0187064
ENSSSCG00000021828	TAPT1	-0.914411	0.0188937
ENSSSCG00000032081	NDUFS3	-0.941239	0.018944
ENSSSCG00000003748	CELF4	-9.23728	0.018944
ENSSSCG00000029902	C11orf80	-1.48196	0.018944
ENSSSCG00000021585	OXTR	-7.3419	0.018944
ENSSSCG00000004946	ZWILCH	-0.682092	0.0189576
ENSSSCG00000007477	NFATC2	-1.4743	0.018986
ENSSSCG00000035762	0	-0.909326	0.0192487
ENSSSCG00000012847	TALDO1	-1.14275	0.0194204
ENSSSCG00000029175	FAM200A	1.46421	0.0196008
ENSSSCG00000027085	UQCRFS1	-0.960461	0.0197753
ENSSSCG00000012452	0	-0.69793	0.019897
ENSSSCG00000004819	CERS3	-5.24302	0.0202104
ENSSSCG00000017544	ATP5MC1	-1.21681	0.0202355
ENSSSCG00000021241	ADAMTS13	1.43554	0.0202355
ENSSSCG00000033229	NRXN2	-7.67214	0.0202355
ENSSSCG00000043449	0	1.20217	0.0202355
ENSSSCG00000031173	KCNMB4	-0.687212	0.0203046
ENSSSCG00000004420	TRAF3IP2	0.711434	0.0203046
ENSSSCG00000005613	LRSAM1	0.631137	0.0203046
ENSSSCG00000039635	0	-0.754809	0.0203046
ENSSSCG00000035854	RAB11FIP3	0.815104	0.0203046
ENSSSCG00000021739	HSD17B12	-1.2721	0.0203046
ENSSSCG00000013931	GMIP	3.79409	0.0203046
ENSSSCG00000028217	0	-1.22699	0.0203046
ENSSSCG00000022405	P2RX1	1.37002	0.0203046
ENSSSCG00000009151	CYP2U1	-0.70996	0.0203046
ENSSSCG00000017249	SSTR2	-7.25316	0.0203825
ENSSSCG00000037451	PPFIA1	0.616391	0.0205064
ENSSSCG00000023760	CLEC14A	0.793271	0.0205064
ENSSSCG00000027230	SLC35G1	-1.03913	0.0207948
ENSSSCG00000038766	MAD1L1	1.07124	0.0208327
ENSSSCG00000039977	0	-4.34185	0.0209197
ENSSSCG00000028996	ALDH1A1	-0.898243	0.0211531
ENSSSCG00000016127	NDUFS1	-0.837644	0.0211879
ENSSSCG00000035460	0	1.08808	0.0214298
ENSSSCG00000007171	EBF4	-1.62974	0.0215229
ENSSSCG00000000478	GRIP1	-2.19975	0.0215887
ENSSSCG00000007248	ASXL1	0.856684	0.0215887
ENSSSCG00000006379	CD48	-1.89965	0.0215887
ENSSSCG00000031557	CHCHD6	-1.15311	0.0216237
ENSSSCG00000025152	CEP89	0.87276	0.0218972
ENSSSCG00000021418	LSS	-1.17275	0.0219012
ENSSSCG00000050530	SRRD	1.02152	0.022056
ENSSSCG00000043694	0	1.19329	0.022056
ENSSSCG00000000719	NDUFA9	-1.03586	0.0221292
ENSSSCG00000022758	PECR	-1.04282	0.0221292
ENSSSCG00000016288	CHRNG	1.74061	0.0221292
ENSSSCG00000008195	COX5B	-1.08652	0.0221292
ENSSSCG00000012272	ZNF157	-7.38864	0.0221788
ENSSSCG00000009178	H2AFZ	-0.997062	0.0221897
ENSSSCG00000023277	NDUFA1	-0.918056	0.0223881
ENSSSCG00000032833	CD320	-1.20874	0.0226794
ENSSSCG00000017907	PFN1	-0.612011	0.022684
ENSSSCG00000000194	0	-0.74777	0.022959
ENSSSCG00000002952	YIF1B	-0.787685	0.022959
ENSSSCG00000027882	C1orf115	0.758255	0.022959
ENSSSCG00000029866	CCDC112	1.21335	0.022959
ENSSSCG00000017411	KCNH4	-7.33976	0.0230429
ENSSSCG00000008140	SLC5A7	-7.43948	0.0231389
ENSSSCG00000013366	LDHA	-1.00673	0.0233106
ENSSSCG00000016714	CYCS	-0.899377	0.0233106
XLOC_111627	#N/A	3.85627	0.0235126
ENSSSCG00000011795	IGF2BP2	1.20491	0.0238682
ENSSSCG00000007814	KATNIP	0.746184	0.0242784
ENSSSCG00000002349	ACOT4	-0.797989	0.0243795
ENSSSCG00000011356	UQCRC1	-0.905104	0.0245123
ENSSSCG00000011903	B4GALT4	-0.743911	0.024591
ENSSSCG00000000142	FOXRED2	0.874635	0.0246085
ENSSSCG00000006930	SH3GLB1	0.590941	0.0251309
ENSSSCG00000012110	MID1	0.949768	0.0251764
ENSSSCG00000004134	PEX3	-0.822469	0.0251858
ENSSSCG00000017502	PGAP3	1.16447	0.0253797
ENSSSCG00000039713	0	-1.29899	0.0253797
ENSSSCG00000007084	BFSP1	1.41056	0.0253797
ENSSSCG00000006809	RBM15	0.718546	0.0254678
ENSSSCG00000017005	KCNMB1	2.30744	0.0258955
ENSSSCG00000030283	0	-1.14141	0.0261539
ENSSSCG00000028942	NRXN3	-7.37964	0.026348
ENSSSCG00000011978	CPOX	-0.746657	0.0264877
ENSSSCG00000030908	0	0.935462	0.0265609
ENSSSCG00000005267	ANXA1	-1.10737	0.0265609
ENSSSCG00000026052	LSM14B	0.651521	0.0265706
ENSSSCG00000009336	RXFP2	-2.09894	0.0267191
ENSSSCG00000046748	0	-5.25426	0.0275993
ENSSSCG00000032054	CNPY4	-3.10953	0.0276947
ENSSSCG00000027609	GC	-7.40185	0.0276947
ENSSSCG00000027928	TMEM9	1.00618	0.0276947
ENSSSCG00000036274	0	-0.905257	0.0277686
ENSSSCG00000009300	WASF3	0.648853	0.0277722
ENSSSCG00000048477	0	-8.93562	0.0278566
ENSSSCG00000000146	MYH11	1.35394	0.0279167
ENSSSCG00000033946	DIDO1	1.34081	0.028325
ENSSSCG00000040162	NUPR1	1.11899	0.0283485
ENSSSCG00000037671	PACS2	0.681051	0.0284523
ENSSSCG00000023264	IDH1	-0.892071	0.0287882
ENSSSCG00000037032	DNASE1L1	-0.721551	0.0288424
ENSSSCG00000006359	ADAMTS4	-1.06351	0.0288943
ENSSSCG00000000515	TRHDE	-2.20834	0.0288943
ENSSSCG00000002306	GALNT16	-0.667207	0.0288943
ENSSSCG00000015859	SAP130	0.644064	0.0288943
ENSSSCG00000034086	ATP5F1C	-0.890106	0.0289146
ENSSSCG00000043890	0	-4.31321	0.0289146
ENSSSCG00000013616	ZNF653	2.04165	0.0289146
ENSSSCG00000032165	ATP5MK	-1.013	0.0289146
ENSSSCG00000007842	SDR42E2	2.64146	0.0289146
ENSSSCG00000017406	STAT5B	0.605208	0.0290866
ENSSSCG00000039245	RIMS3	1.85358	0.0294271
ENSSSCG00000004453	SNAP91	-8.83817	0.0294271
ENSSSCG00000014329	CDC25C	-0.778601	0.0294271
ENSSSCG00000038350	KISS1	-2.26075	0.0296456
ENSSSCG00000040507	PDLIM7	0.73507	0.0297883
ENSSSCG00000032877	0	1.22864	0.0297883
ENSSSCG00000014012	GFPT2	1.3964	0.0299732
ENSSSCG00000007448	OCSTAMP	-3.13724	0.0299732
ENSSSCG00000037131	CLTA	-0.81921	0.0299732
ENSSSCG00000036883	FABP3	-1.26164	0.0299754
ENSSSCG00000006499	LAMTOR2	-0.828078	0.0299754
ENSSSCG00000005494	TNC	-1.019	0.0299754
ENSSSCG00000029745	FAM193A	1.20339	0.0299754
ENSSSCG00000031172	RNF11	-0.658341	0.0299754
ENSSSCG00000021161	CKS2	-0.996759	0.0302656
ENSSSCG00000020678	BANP	1.2239	0.0306466
ENSSSCG00000010536	CNNM1	-7.1407	0.0306466
ENSSSCG00000048668	0	-8.75649	0.0306993
ENSSSCG00000002754	NQO1	-0.790164	0.0310652
ENSSSCG00000007476	KCNG1	-7.2256	0.0310652
ENSSSCG00000007836	SCNN1G	-7.40093	0.0311288
ENSSSCG00000039594	SSBP3	0.799419	0.0311288
ENSSSCG00000001536	SCUBE3	2.52143	0.0318428
ENSSSCG00000036136	BHLHE40	-0.689956	0.0322556
ENSSSCG00000009874	RASAL1	-0.976427	0.0324053
ENSSSCG00000024144	0	-1.00675	0.0324053
ENSSSCG00000003705	CABLES1	1.32132	0.0324064
ENSSSCG00000028431	HSD17B4	-0.784386	0.0324154
ENSSSCG00000011916	ATP6V1A	-0.785583	0.0324154
ENSSSCG00000000362	0	-1.32966	0.0325032
ENSSSCG00000032810	0	7.27305	0.0325032
ENSSSCG00000034259	PMEPA1	0.700461	0.0325318
ENSSSCG00000024052	GPX4	-0.927392	0.0325836
ENSSSCG00000012324	IQSEC2	0.694692	0.032809
ENSSSCG00000010995	CHMP5	-0.667141	0.0328496
ENSSSCG00000027114	SCP2	-0.903375	0.0328496
ENSSSCG00000007516	0	0.9102	0.0328496
ENSSSCG00000013046	COX8A	-0.916327	0.0332863
ENSSSCG00000007770	ORAI3	1.15921	0.0332863
ENSSSCG00000012065	KCNJ6	-8.72666	0.0333474
ENSSSCG00000036746	RASL10B	2.04181	0.0339903
ENSSSCG00000012042	ATP5PO	-0.674247	0.0341278
ENSSSCG00000027286	DGKQ	0.940247	0.0341938
ENSSSCG00000010566	FBXW4	0.774954	0.0343825
ENSSSCG00000007589	0	9.08985	0.0343825
ENSSSCG00000016290	EFHD1	1.22737	0.0347357
ENSSSCG00000010537	GOT1	-0.846887	0.034745
ENSSSCG00000009498	0	-3.86278	0.0349295
ENSSSCG00000033299	FLNA	0.704138	0.034936
ENSSSCG00000015395	GRM3	-8.67614	0.035083
ENSSSCG00000016554	MEST	-1.30111	0.0350873
ENSSSCG00000040608	AKR1B1	-0.951493	0.0350873
ENSSSCG00000038861	TM2D1	-0.695917	0.0352225
ENSSSCG00000022261	0	-7.40771	0.0352225
ENSSSCG00000014598	PPFIBP2	0.706667	0.0353335
ENSSSCG00000017605	MMD	-1.02305	0.0357531
ENSSSCG00000035103	PIGL	0.8016	0.0357531
ENSSSCG00000032857	S100A12	-1.49537	0.0357531
ENSSSCG00000044201	0	-5.10874	0.0359342
ENSSSCG00000002354	COQ6	-0.893258	0.0360164
ENSSSCG00000015512	PAPPA2	1.37821	0.0362444
ENSSSCG00000030581	VGLL4	0.876044	0.0362444
ENSSSCG00000037910	DUSP6	-0.614341	0.0362444
ENSSSCG00000022303	SLC25A16	-0.892885	0.0363557
ENSSSCG00000031918	CYC1	-0.970422	0.0363557
ENSSSCG00000020859	CBLN2	-7.32256	0.0363557
ENSSSCG00000008692	ADD1	0.630938	0.0363557
ENSSSCG00000039894	0	0.7479	0.0365234
ENSSSCG00000025560	PGLYRP2	-1.45315	0.037087
ENSSSCG00000023186	CA4	-0.913357	0.0371111
ENSSSCG00000030196	CUL9	0.728455	0.0371801
ENSSSCG00000040843	0	-8.6961	0.0373999
ENSSSCG00000015515	BRINP2	-1.97237	0.0376215
ENSSSCG00000035836	0	-0.664113	0.037719
ENSSSCG00000015741	CFAP221	-8.82933	0.037719
ENSSSCG00000013351	NAV2	-1.0592	0.037719
ENSSSCG00000017511	PLXDC1	1.76971	0.0379724
ENSSSCG00000027072	ATP5IF1	-0.877501	0.0383641
ENSSSCG00000036824	AVPI1	-0.966778	0.0392965
ENSSSCG00000015846	RBPMS	0.786976	0.0396761
ENSSSCG00000011627	ACP3	-8.70111	0.0396761
ENSSSCG00000009534	0	-0.696781	0.0396761
ENSSSCG00000012693	0	-0.757662	0.0396761
ENSSSCG00000009378	CKAP2	-1.17094	0.040053
ENSSSCG00000004191	MOXD1	1.90314	0.040885
ENSSSCG00000017671	RNFT1	-0.83631	0.040885
ENSSSCG00000034313	SELENOW	-0.812293	0.0409749
ENSSSCG00000003776	ACADM	-0.605704	0.0416318
ENSSSCG00000002546	XRCC3	0.598316	0.0416806
ENSSSCG00000031128	PPIC	-0.795512	0.0416806
ENSSSCG00000031710	BRF1	0.644292	0.0416806
ENSSSCG00000004193	ENPP1	-0.852526	0.0416806
ENSSSCG00000028723	CCDC102A	0.888971	0.0417939
ENSSSCG00000026302	0	-1.55418	0.0420483
ENSSSCG00000031201	LMOD1	1.32368	0.0421732
ENSSSCG00000034993	NREP	-1.69721	0.0422038
ENSSSCG00000010795	NDUFAB1	-0.83589	0.0423504
ENSSSCG00000006925	KYAT3	-0.723212	0.0423504
ENSSSCG00000016233	SERPINE2	-1.22558	0.0426341
XLOC_142507	#N/A	0.880179	0.0427095
ENSSSCG00000012459	APOOL	-0.814397	0.0427095
ENSSSCG00000015911	SCN3A	-1.10572	0.0427095
ENSSSCG00000012903	PITPNM1	0.719632	0.0431341
ENSSSCG00000010107	MED15	0.886832	0.0431629
ENSSSCG00000001762	CIB2	-1.13455	0.0432877
ENSSSCG00000016044	ORMDL1	-0.660065	0.0432886
ENSSSCG00000038901	CLDN15	1.07097	0.0432952
ENSSSCG00000002387	GPATCH2L	1.12193	0.0432952
ENSSSCG00000011912	QTRT2	-1.03714	0.0433718
ENSSSCG00000000021	0	8.57998	0.0436354
ENSSSCG00000001518	ITPR3	0.888806	0.0436354
ENSSSCG00000040163	QSOX2	0.658287	0.0440192
ENSSSCG00000009676	ZNF395	0.729775	0.0440192
ENSSSCG00000032057	EPHX4	-8.88839	0.044208
ENSSSCG00000025794	FBRS	1.17492	0.0444525
ENSSSCG00000036751	PPM1H	0.832446	0.0444525
ENSSSCG00000040037	MTSS2	0.806852	0.0445024
ENSSSCG00000016174	FN1	-0.882696	0.0445796
ENSSSCG00000003732	MEP1B	-6.91173	0.0445796
ENSSSCG00000011593	TMCC1	0.763703	0.0448331
ENSSSCG00000015581	CENPF	-1.43774	0.0448737
ENSSSCG00000045986	0	-7.56289	0.0450265
ENSSSCG00000008642	ASAP2	0.6756	0.0454133
ENSSSCG00000015548	RGSL1	1.5009	0.0454355
ENSSSCG00000009616	HR	-0.946718	0.0454355
ENSSSCG00000030469	BUB1	-1.88224	0.0454985
ENSSSCG00000017792	CORO6	1.19503	0.0456463
ENSSSCG00000015496	CENPL	-1.62999	0.046545
ENSSSCG00000014136	VCAN	-1.14875	0.046573
ENSSSCG00000051740	0	-7.07401	0.0466929
ENSSSCG00000040713	TXLNG	0.763557	0.0466929
ENSSSCG00000028896	DIO1	-4.02183	0.0467724
ENSSSCG00000023556	SUPT5H	7.87407	0.0470342
ENSSSCG00000011751	TMEM212	-7.18971	0.0470342
ENSSSCG00000037660	0	-0.744669	0.0471015
ENSSSCG00000040521	0	0.715543	0.0472655
ENSSSCG00000037262	PTX4	2.82782	0.0472829
ENSSSCG00000021813	SLC26A3	-4.87856	0.0474558
ENSSSCG00000040599	TBC1D25	0.809895	0.0475964
ENSSSCG00000005354	TRMT10B	-0.912649	0.0475964
ENSSSCG00000010030	EIF4ENIF1	0.777765	0.047812
ENSSSCG00000025266	VWA3A	1.21084	0.0479536
ENSSSCG00000016535	CALD1	-0.678792	0.0486532
ENSSSCG00000002351	0	-0.93723	0.0490137
ENSSSCG00000001808	CPEB1	1.28321	0.0491847
ENSSSCG00000033744	0	-0.8172	0.0493844
ENSSSCG00000049186	0	-1.54794	0.0498402
ENSSSCG00000040130	FAM155A	-12.1258	0.0498402
ENSSSCG00000035518	0	-2.84843	0.0498667
