# Supplementary material for: Integrated Analysis of Long Non-Coding RNA and mRNA to Reveal Putative Candidate Genes Associated with Backfat Quality in Beijing Black Pig
Source: Foods. 2022 Nov 15;11(22):3654. doi: 10.3390/foods11223654 (PMC9689697; doi:10.3390/foods11223654)
Supplement: Supplementary file 1 [file foods-11-03654-s001.zip › Table S5.xlsx]

## Sheet: Table S5
	log2FoldChange	padj
TCONS_00224182	14.8702	1.4e-24
TCONS_00091354	-12.8363	2.47e-21
TCONS_00282681	-12.2596	1.24e-17
TCONS_00035263	13.0313	1.74e-16
TCONS_00044203	-11.1341	6.68e-16
TCONS_00136311	-12.6591	4.86e-15
TCONS_00281166	-12.2563	2.33e-14
TCONS_00126361	12.0992	2.33e-14
TCONS_00175321	-11.3594	1.49e-13
TCONS_00111522	-12.8963	1.6e-13
TCONS_00094048	-15.3913	1.62e-13
TCONS_00140815	-11.178	4.2e-13
TCONS_00246231	-12.7059	5.58e-13
TCONS_00300483	-11.0279	8.66e-13
TCONS_00238303	12.8207	1.33e-12
TCONS_00272077	13.6301	8.89e-12
TCONS_00304616	-11.4239	1.85e-11
TCONS_00296597	12.6967	6.23e-11
TCONS_00282857	-18.3352	6.23e-11
TCONS_00296593	-28.6838	1.03e-10
TCONS_00233798	10.438	1.05e-10
TCONS_00121711	-10.0659	1.17e-10
TCONS_00140798	-13.0752	1.85e-10
TCONS_00250705	-13.4209	2.67e-10
TCONS_00138546	-9.90285	2.72e-10
TCONS_00063482	-9.64985	2.72e-10
TCONS_00259203	-28.0068	2.72e-10
TCONS_00041100	12.3485	2.72e-10
TCONS_00256285	-9.07823	3.46e-10
TCONS_00278134	-12.7454	4.27e-10
TCONS_00093273	-12.2133	4.85e-10
TCONS_00052227	-10.6054	5.41e-10
TCONS_00079146	-10.4991	6.52e-10
TCONS_00259197	13.2242	8.12e-10
TCONS_00227333	26.8704	1.7e-09
TCONS_00234841	-10.034	3.05e-09
TCONS_00102143	9.49085	4.13e-09
TCONS_00085813	-11.9365	4.13e-09
TCONS_00301114	-9.3086	4.18e-09
TCONS_00222052	-9.55031	4.9e-09
TCONS_00152805	-26.0678	6e-09
TCONS_00014708	-12.6661	6.54e-09
TCONS_00261208	-11.1727	6.57e-09
TCONS_00058865	12.0129	7.17e-09
TCONS_00116930	-25.8675	7.74e-09
TCONS_00101632	2.1748	8.53e-09
TCONS_00300468	-10.7815	9.5e-09
TCONS_00140801	-12.743	1.01e-08
TCONS_00282848	11.8063	1.18e-08
TCONS_00318985	-25.4971	1.32e-08
TCONS_00173059	-2.61197	1.41e-08
TCONS_00300477	-10.2536	1.89e-08
TCONS_00272792	-11.1765	3.3e-08
TCONS_00155125	10.6613	4.16e-08
TCONS_00240274	-11.2864	4.63e-08
TCONS_00305190	-9.45552	5.71e-08
TCONS_00064570	-2.22398	9.48e-08
TCONS_00175261	4.86392	1.61e-07
TCONS_00318670	-9.76082	1.71e-07
TCONS_00033154	-9.49233	1.86e-07
TCONS_00142409	-11.6196	2.58e-07
TCONS_00174501	-10.604	3.76e-07
TCONS_00127982	9.45779	5.26e-07
ENSSSCT00000072882	-8.16466	5.65e-07
TCONS_00122607	-8.70935	5.95e-07
TCONS_00264872	-12.4178	6.48e-07
TCONS_00017865	8.54723	6.87e-07
ENSSSCT00000090542	-8.26829	7.56e-07
TCONS_00252186	8.56146	1.2e-06
TCONS_00132536	-11.789	1.33e-06
TCONS_00154929	-11.1485	1.43e-06
TCONS_00300495	-9.72061	1.52e-06
TCONS_00239894	-4.09161	1.52e-06
TCONS_00152822	-10.8808	1.96e-06
TCONS_00300481	-9.91971	2e-06
ENSSSCT00000083210	-8.3549	2.53e-06
TCONS_00140803	-8.96366	3.15e-06
TCONS_00290219	-8.53325	3.41e-06
TCONS_00307967	-8.88044	4.61e-06
ENSSSCT00000040455	-7.30836	5.47e-06
TCONS_00302232	-9.22831	5.63e-06
TCONS_00000237	9.39535	8.15e-06
TCONS_00062238	-8.10529	8.51e-06
TCONS_00065197	-7.50317	9.47e-06
TCONS_00158142	-9.6875	1.04e-05
ENSSSCT00000076421	-7.93871	1.1e-05
TCONS_00262379	-1.37935	1.1e-05
TCONS_00132552	-8.53574	1.37e-05
ENSSSCT00000084718	-7.01517	1.4e-05
ENSSSCT00000069893	-8.25853	1.41e-05
ENSSSCT00000090939	5.18256	1.41e-05
TCONS_00174795	-1.75706	1.47e-05
ENSSSCT00000082857	-7.66047	1.59e-05
TCONS_00142251	-2.10746	1.59e-05
TCONS_00144414	-3.35395	2.08e-05
TCONS_00173537	-10.0454	3.42e-05
ENSSSCT00000085552	-8.34615	3.42e-05
TCONS_00204933	9.94342	3.83e-05
TCONS_00151368	-9.47115	4.86e-05
TCONS_00194988	-1.8867	5.16e-05
TCONS_00104439	-1.6345	5.96e-05
TCONS_00250336	13.3053	6.84e-05
TCONS_00261206	-8.77858	7.21e-05
TCONS_00133266	-1.13553	7.66e-05
ENSSSCT00000080396	-7.17931	8.63e-05
TCONS_00268661	-1.54811	8.92e-05
ENSSSCT00000074880	-7.04571	9.35e-05
TCONS_00132019	2.03021	9.39e-05
TCONS_00276112	-9.69566	0.000104217
ENSSSCT00000086043	-4.72421	0.000104217
TCONS_00100915	10.5222	0.000104217
TCONS_00300476	-9.60292	0.000105183
TCONS_00250104	-0.665424	0.000108794
TCONS_00166127	10.7604	0.000137308
ENSSSCT00000081414	-6.80712	0.000137308
TCONS_00109243	2.17811	0.000140487
TCONS_00252520	-11.5766	0.000140856
TCONS_00123187	-1.19619	0.000149633
TCONS_00120002	-8.71005	0.000152233
TCONS_00089579	-10.5404	0.000161535
TCONS_00129575	-1.38336	0.000162182
TCONS_00234525	-9.40758	0.000179044
TCONS_00089981	6.65155	0.000189147
TCONS_00048405	3.48839	0.000198488
ENSSSCT00000077351	-7.04091	0.000225603
TCONS_00306728	2.16062	0.00026647
TCONS_00252347	-3.02378	0.000278071
TCONS_00316036	-1.1498	0.00030375
TCONS_00205376	-1.23699	0.000322075
TCONS_00250121	-3.50206	0.000344478
TCONS_00008058	-9.53455	0.00036124
TCONS_00028382	-1.88584	0.000371043
ENSSSCT00000079861	6.97451	0.000422483
TCONS_00232121	-7.70822	0.000488674
ENSSSCT00000072303	-6.71907	0.000537826
TCONS_00099109	-1.51133	0.000570229
TCONS_00099710	-13.0357	0.00062452
TCONS_00304212	-7.87848	0.000683401
TCONS_00140808	-9.15095	0.000748914
ENSSSCT00000084875	-7.25365	0.000790082
TCONS_00094116	-1.49029	0.00099027
TCONS_00072647	-2.21207	0.00118238
ENSSSCT00000086722	-7.90908	0.00118238
ENSSSCT00000069026	-8.08889	0.00118238
TCONS_00180617	7.45754	0.00123447
ENSSSCT00000072852	-7.38895	0.00129798
TCONS_00174435	6.39114	0.00144431
TCONS_00302231	-8.61276	0.00154136
ENSSSCT00000078282	-6.03092	0.00156266
ENSSSCT00000071780	-8.96762	0.0016187
TCONS_00215322	8.02168	0.00190187
TCONS_00208233	0.836024	0.00190187
ENSSSCT00000083231	-8.18487	0.00194735
TCONS_00182795	0.965563	0.00199933
ENSSSCT00000078460	-5.88658	0.00230194
ENSSSCT00000080067	-6.21439	0.00230265
TCONS_00219951	-7.53581	0.00237733
TCONS_00214071	-2.98318	0.00237733
TCONS_00282800	1.62011	0.00237733
TCONS_00207873	1.49572	0.00241612
ENSSSCT00000082834	-6.89391	0.00246023
TCONS_00016061	-4.51421	0.0026707
TCONS_00008769	8.34846	0.00278319
ENSSSCT00000071270	1.62987	0.00283604
TCONS_00012871	-1.84373	0.00289555
ENSSSCT00000088344	1.55775	0.00295123
TCONS_00297453	-1.83831	0.00295123
ENSSSCT00000072499	6.25602	0.0030497
ENSSSCT00000087419	-5.89613	0.00319095
TCONS_00234227	6.54257	0.00355018
TCONS_00210838	-1.90473	0.00373788
TCONS_00304873	-2.46806	0.00379149
TCONS_00249475	-2.01039	0.00379149
TCONS_00152274	-2.66207	0.00416269
TCONS_00029031	-0.990745	0.00418187
ENSSSCT00000067348	6.06263	0.0041964
ENSSSCT00000077287	-6.68503	0.00426608
TCONS_00054349	1.286	0.00441483
TCONS_00065939	0.934067	0.00441483
TCONS_00058503	8.33712	0.00449974
TCONS_00318672	-8.0133	0.00486469
TCONS_00019692	2.88242	0.00486469
ENSSSCT00000089867	-6.26587	0.00500633
ENSSSCT00000083260	-8.01178	0.0052364
TCONS_00121827	-1.6646	0.00559734
TCONS_00196211	-6.94102	0.00559734
TCONS_00054908	-5.82384	0.00573563
ENSSSCT00000088091	-6.73787	0.00585415
ENSSSCT00000081116	-8.28339	0.00596545
TCONS_00205034	-1.4259	0.0061843
TCONS_00006838	-0.95849	0.00629093
TCONS_00277087	-1.06252	0.00648696
TCONS_00145442	-1.74306	0.00701282
TCONS_00153059	-1.06971	0.00726324
TCONS_00247538	-1.02247	0.0073507
TCONS_00182796	1.35947	0.00748192
ENSSSCT00000085840	-6.91034	0.00762311
ENSSSCT00000066614	-6.70529	0.00802685
TCONS_00232416	-0.962954	0.00841505
TCONS_00032432	-2.20726	0.00876022
TCONS_00096398	-6.32568	0.00877648
ENSSSCT00000087681	1.34097	0.00981707
ENSSSCT00000088568	-5.91183	0.0101534
ENSSSCT00000087691	7.45673	0.0101534
ENSSSCT00000075033	-6.11463	0.0107795
ENSSSCT00000076984	-3.88145	0.0109441
TCONS_00208286	-1.40651	0.0110663
TCONS_00199506	-1.65154	0.0111976
TCONS_00301647	-2.50084	0.0123268
TCONS_00284360	1.34154	0.0127642
ENSSSCT00000076488	-6.29874	0.0128227
ENSSSCT00000077447	2.05631	0.0139854
TCONS_00202736	-6.2999	0.0141413
ENSSSCT00000081099	1.7092	0.0147723
ENSSSCT00000047216	7.58827	0.0149164
TCONS_00237391	11.6332	0.0149654
TCONS_00259004	-1.72948	0.0149709
TCONS_00197785	-13.9778	0.0153769
TCONS_00283757	-1.47911	0.0154658
ENSSSCT00000071601	-5.62426	0.0155318
TCONS_00065981	2.0831	0.0155577
TCONS_00230769	0.651423	0.0161641
ENSSSCT00000079903	13.8927	0.0163377
TCONS_00148627	1.10886	0.0169427
TCONS_00303966	-4.3318	0.0170188
TCONS_00019448	-0.868045	0.0174696
TCONS_00297873	2.49139	0.0176633
TCONS_00163277	-6.36589	0.0179993
TCONS_00175643	-7.92533	0.0184916
TCONS_00204260	-2.09196	0.019098
ENSSSCT00000072245	-6.44172	0.0192925
ENSSSCT00000077323	-5.44237	0.019812
TCONS_00150907	0.84452	0.0208598
ENSSSCT00000068579	-5.59701	0.0209504
TCONS_00292325	5.59426	0.0224455
ENSSSCT00000080518	-5.51144	0.023691
TCONS_00215131	-1.5907	0.0236932
TCONS_00300482	-6.19392	0.0241138
ENSSSCT00000075678	-5.51532	0.024246
TCONS_00167039	6.50988	0.0250833
ENSSSCT00000082616	-5.8092	0.0250833
TCONS_00054408	-13.3324	0.025643
TCONS_00283679	-13.3154	0.0258939
ENSSSCT00000081197	-7.0518	0.0258939
TCONS_00303614	-1.21264	0.0261636
TCONS_00173538	-8.47953	0.026403
ENSSSCT00000074832	-5.96556	0.0265584
TCONS_00133075	2.95514	0.0266339
TCONS_00318412	-6.35813	0.0267147
TCONS_00130818	-13.2501	0.0268226
ENSSSCT00000018133	-2.03109	0.0270505
ENSSSCT00000052237	-5.66871	0.0287427
TCONS_00043392	1.05003	0.0292325
TCONS_00175044	-13.1346	0.0294013
TCONS_00202838	-10.2757	0.0299328
TCONS_00055336	-0.654514	0.0299328
TCONS_00062250	-3.27259	0.0299328
TCONS_00026169	-0.703252	0.0303607
TCONS_00186356	13.0456	0.0311922
ENSSSCT00000082339	-7.23034	0.0317669
TCONS_00282098	-6.07618	0.0320895
TCONS_00227721	0.989065	0.0320895
TCONS_00095959	-0.892905	0.0320895
TCONS_00247860	1.95755	0.0322721
TCONS_00149488	2.45247	0.0325394
TCONS_00303088	12.9618	0.0328181
TCONS_00296587	-12.9301	0.0336605
TCONS_00208232	1.27533	0.0344955
ENSSSCT00000089505	-6.46449	0.0346555
TCONS_00058603	1.9355	0.0358133
TCONS_00109081	-2.43125	0.0364568
TCONS_00102241	-5.49186	0.0372949
TCONS_00296586	-12.7447	0.0389752
TCONS_00070483	-1.51589	0.0395064
TCONS_00126234	-12.7195	0.0395849
TCONS_00254780	2.49808	0.0397896
TCONS_00165639	-1.69236	0.0407633
TCONS_00310567	-12.6655	0.0411165
TCONS_00047779	1.79625	0.0412359
TCONS_00078996	-12.6301	0.042144
TCONS_00300838	-5.37175	0.0429664
TCONS_00291514	0.766174	0.0435819
TCONS_00310666	-1.87186	0.0435819
TCONS_00060668	1.33206	0.0449558
TCONS_00015186	-12.5017	0.0464409
TCONS_00162427	-12.4894	0.046789
TCONS_00167919	-12.445	0.0484623
ENSSSCT00000090886	-1.38169	0.0484623
ENSSSCT00000082885	-5.0006	0.0485678
TCONS_00138523	-3.19026	0.0491793
