# Supplementary material for: Integrated Analysis of Long Non-Coding RNA and mRNA to Reveal Putative Candidate Genes Associated with Backfat Quality in Beijing Black Pig
Source: Foods. 2022 Nov 15;11(22):3654. doi: 10.3390/foods11223654 (PMC9689697; doi:10.3390/foods11223654)
Supplement: Supplementary file 1 [file foods-11-03654-s001.zip › Table S6.xlsx]

## Sheet: 2022.7DEL顺式靶基因
1
TCONS_00035263	ENSSSCG00000011022
TCONS_00044203	ENSSSCG00000025130
TCONS_00136311	ENSSSCG00000036974
TCONS_00126361	ENSSSCG00000017095
TCONS_00140815	ENSSSCG00000036974
TCONS_00300483
TCONS_00304616
TCONS_00140798	ENSSSCG00000036974
TCONS_00063482	ENSSSCG00000036033
TCONS_00301114
TCONS_00261208	ENSSSCG00000024149
TCONS_00300468
TCONS_00140801	ENSSSCG00000036974
TCONS_00318985	ENSSSCG00000046447
TCONS_00300477
TCONS_00305190
TCONS_00318670
TCONS_00142409	ENSSSCG00000016611
TCONS_00127982	ENSSSCG00000016842
ENSSSCT00000090542
TCONS_00300495
TCONS_00300481
ENSSSCT00000083210
TCONS_00140803	ENSSSCG00000036974
ENSSSCT00000040455
TCONS_00158142	ENSSSCG00000024189
ENSSSCT00000076421
TCONS_00142251	ENSSSCG00000047399
ENSSSCT00000085552
TCONS_00261206	ENSSSCG00000024149
ENSSSCT00000074880
ENSSSCT00000086043
TCONS_00100915	ENSSSCG00000010212
TCONS_00300476
ENSSSCT00000081414
TCONS_00123187	ENSSSCG00000030991
ENSSSCT00000077351	ENSSSCG00000038549
TCONS_00252347	ENSSSCG00000024149
ENSSSCT00000079861	ENSSSCG00000012597
TCONS_00232121
ENSSSCT00000072303	ENSSSCG00000049976
TCONS_00304212	ENSSSCG00000042926
TCONS_00140808	ENSSSCG00000036974
ENSSSCT00000069026	ENSSSCG00000035244
ENSSSCT00000072852
TCONS_00174435	ENSSSCG00000008176
ENSSSCT00000071780	ENSSSCG00000037754
ENSSSCT00000083231
ENSSSCT00000078460
ENSSSCT00000080067
TCONS_00219951
ENSSSCT00000071270	ENSSSCG00000043451
TCONS_00012871
ENSSSCT00000087419
TCONS_00304873	ENSSSCG00000046748
TCONS_00249475	ENSSSCG00000001065
TCONS_00065939	ENSSSCG00000011496
TCONS_00318672
ENSSSCT00000088091
TCONS_00145442	ENSSSCG00000016549
ENSSSCT00000085840	ENSSSCG00000006277
ENSSSCT00000066614
ENSSSCT00000088568
ENSSSCT00000087691
TCONS_00301647	XLOC_202057
TCONS_00284360	ENSSSCG00000015015
ENSSSCT00000076488
ENSSSCT00000077447
ENSSSCT00000081099	ENSSSCG00000032599
TCONS_00237391	ENSSSCG00000032145
ENSSSCT00000071601
TCONS_00065981
ENSSSCT00000079903	ENSSSCG00000032599
ENSSSCT00000068579
ENSSSCT00000080518
TCONS_00300482
ENSSSCT00000075678
ENSSSCT00000074832
TCONS_00318412
ENSSSCT00000052237
TCONS_00175044
ENSSSCT00000082339
ENSSSCT00000089505	ENSSSCG00000011942
TCONS_00109081	ENSSSCG00000015874
TCONS_00300838	ENSSSCG00000048219
ENSSSCT00000090886
TCONS_00091354	ENSSSCG00000026819
	ENSSSCG00000010151
TCONS_00094048	ENSSSCG00000026798
	ENSSSCG00000035347
TCONS_00246231	ENSSSCG00000038329
	ENSSSCG00000003773
TCONS_00238303	ENSSSCG00000035222
	ENSSSCG00000002868
TCONS_00296597	ENSSSCG00000015368
	ENSSSCG00000015371
TCONS_00296593	ENSSSCG00000015368
	ENSSSCG00000015371
TCONS_00093273	ENSSSCG00000037404
	ENSSSCG00000036822
TCONS_00085813	ENSSSCG00000012018
	ENSSSCG00000012019
TCONS_00155125	ENSSSCG00000048155
	ENSSSCG00000047325
TCONS_00033154	ENSSSCG00000010814
	ENSSSCG00000050713
ENSSSCT00000072882	ENSSSCG00000046361
	ENSSSCG00000045072
TCONS_00122607	ENSSSCG00000016782
	ENSSSCG00000016781
TCONS_00302232	ENSSSCG00000035789
	ENSSSCG00000013412
TCONS_00262379	ENSSSCG00000044591
	ENSSSCG00000001946
TCONS_00132552	ENSSSCG00000025799
	ENSSSCG00000044384
ENSSSCT00000084718	ENSSSCG00000011535
	ENSSSCG00000034197
ENSSSCT00000069893	ENSSSCG00000004576
	ENSSSCG00000036431
ENSSSCT00000090939	ENSSSCG00000045195
	ENSSSCG00000043332
TCONS_00151368	ENSSSCG00000036546
	ENSSSCG00000022492
ENSSSCT00000080396	ENSSSCG00000045890
	ENSSSCG00000048951
TCONS_00276112	ENSSSCG00000044886
	ENSSSCG00000035621
TCONS_00166127	ENSSSCG00000037582
	ENSSSCG00000014088
ENSSSCT00000086722	ENSSSCG00000038598
	ENSSSCG00000023279
TCONS_00302231	ENSSSCG00000035789
	ENSSSCG00000013412
ENSSSCT00000082834	ENSSSCG00000035307
	ENSSSCG00000037491
TCONS_00008769	ENSSSCG00000038767
	ENSSSCG00000023533
TCONS_00029031	ENSSSCG00000049203
	ENSSSCG00000005215
ENSSSCT00000083260	ENSSSCG00000035307
	ENSSSCG00000037491
TCONS_00054908	ENSSSCG00000051471
	ENSSSCG00000022980
ENSSSCT00000075033	ENSSSCG00000044967
	ENSSSCG00000049823
TCONS_00199506	ENSSSCG00000033690
	ENSSSCG00000021586
ENSSSCT00000047216	ENSSSCG00000026618
	ENSSSCG00000016064
TCONS_00197785	ENSSSCG00000006911
	ENSSSCG00000023654
ENSSSCT00000072245	ENSSSCG00000029536
	ENSSSCG00000035189
TCONS_00167039	ENSSSCG00000014161
	ENSSSCG00000027608
TCONS_00054408	ENSSSCG00000044721
	ENSSSCG00000023169
TCONS_00173538	ENSSSCG00000007973
	ENSSSCG00000007970
TCONS_00130818	ENSSSCG00000049229
	ENSSSCG00000051676
ENSSSCT00000018133	ENSSSCG00000038158
	ENSSSCG00000016653
TCONS_00202838	ENSSSCG00000028902
	ENSSSCG00000033922
TCONS_00095959	ENSSSCG00000010751
	ENSSSCG00000035045
TCONS_00296587	ENSSSCG00000015368
	ENSSSCG00000015371
TCONS_00102241	ENSSSCG00000037404
	ENSSSCG00000036822
TCONS_00296586	ENSSSCG00000015368
	ENSSSCG00000015371
TCONS_00070483	ENSSSCG00000040296
	ENSSSCG00000011791
TCONS_00060668	ENSSSCG00000026665
	ENSSSCG00000017676
ENSSSCT00000082885	ENSSSCG00000011127
	ENSSSCG00000011125
TCONS_00224182	ENSSSCG00000040125
	ENSSSCG00000036060
	ENSSSCG00000036067
	ENSSSCG00000024476
	ENSSSCG00000032443
	ENSSSCG00000033811
	ENSSSCG00000002788
	ENSSSCG00000040749
	ENSSSCG00000033027
	ENSSSCG00000040139
	ENSSSCG00000036321
	ENSSSCG00000022721
	ENSSSCG00000002792
	ENSSSCG00000002793
TCONS_00282681	ENSSSCG00000014861
	ENSSSCG00000014860
	ENSSSCG00000034102
	ENSSSCG00000028979
TCONS_00281166	ENSSSCG00000009215
	ENSSSCG00000009216
	ENSSSCG00000009217
TCONS_00175321	ENSSSCG00000022786
	ENSSSCG00000027320
	ENSSSCG00000008278
	ENSSSCG00000023156
	ENSSSCG00000008287
	ENSSSCG00000049947
	ENSSSCG00000008270
	ENSSSCG00000008268
	ENSSSCG00000008275
	ENSSSCG00000008274
	ENSSSCG00000039882
	ENSSSCG00000008281
	ENSSSCG00000008282
	ENSSSCG00000008284
	ENSSSCG00000033366
	ENSSSCG00000022499
	ENSSSCG00000008263
	ENSSSCG00000022614
	ENSSSCG00000008266
	ENSSSCG00000035061
	ENSSSCG00000008265
TCONS_00111522	ENSSSCG00000039654
	ENSSSCG00000016098
	ENSSSCG00000016096
	ENSSSCG00000016094
	ENSSSCG00000016095
	ENSSSCG00000016093
	ENSSSCG00000036339
TCONS_00272077	ENSSSCG00000032838
	ENSSSCG00000009112
	ENSSSCG00000009111
TCONS_00282857	ENSSSCG00000033822
	ENSSSCG00000039494
	ENSSSCG00000033506
	ENSSSCG00000042960
	ENSSSCG00000031979
	ENSSSCG00000014887
	ENSSSCG00000014892
	ENSSSCG00000014884
TCONS_00233798	ENSSSCG00000027641
	ENSSSCG00000028506
	ENSSSCG00000026264
	ENSSSCG00000021216
	ENSSSCG00000028896
	ENSSSCG00000029698
	ENSSSCG00000028748
	ENSSSCG00000034261
TCONS_00121711	ENSSSCG00000016278
	ENSSSCG00000016275
	ENSSSCG00000016277
	ENSSSCG00000033015
	ENSSSCG00000023994
TCONS_00250705	ENSSSCG00000038892
	ENSSSCG00000033414
	ENSSSCG00000030874
	ENSSSCG00000038570
	ENSSSCG00000001444
TCONS_00259203	ENSSSCG00000001232
	ENSSSCG00000001233
	ENSSSCG00000001234
	ENSSSCG00000001235
	ENSSSCG00000001229
	ENSSSCG00000001342
	ENSSSCG00000001341
	ENSSSCG00000044574
	ENSSSCG00000041364
	ENSSSCG00000024161
TCONS_00041100	ENSSSCG00000021815
	ENSSSCG00000011136
	ENSSSCG00000011137
	ENSSSCG00000028790
	ENSSSCG00000011145
	ENSSSCG00000030030
TCONS_00256285	ENSSSCG00000029760
	ENSSSCG00000002396
	ENSSSCG00000002397
	ENSSSCG00000002398
	ENSSSCG00000002399
	ENSSSCG00000033688
TCONS_00278134	ENSSSCG00000008989
	ENSSSCG00000008990
	ENSSSCG00000008991
TCONS_00138546	ENSSSCG00000007281
	ENSSSCG00000007280
	ENSSSCG00000037510
	ENSSSCG00000007282
TCONS_00282848	ENSSSCG00000014878
	ENSSSCG00000014884
	ENSSSCG00000037251
	ENSSSCG00000014882
	ENSSSCG00000014881
TCONS_00173059	ENSSSCG00000008055
	ENSSSCG00000008054
	ENSSSCG00000008057
	ENSSSCG00000008056
	ENSSSCG00000008051
	ENSSSCG00000026326
	ENSSSCG00000008052
	ENSSSCG00000027098
	ENSSSCG00000037719
TCONS_00272792	ENSSSCG00000028101
	ENSSSCG00000009162
	ENSSSCG00000022282
	ENSSSCG00000023296
TCONS_00240274	ENSSSCG00000038825
	ENSSSCG00000046881
	ENSSSCG00000042026
	ENSSSCG00000032690
	ENSSSCG00000003251
	ENSSSCG00000031793
TCONS_00064570	ENSSSCG00000049186
	ENSSSCG00000011296
	ENSSSCG00000011297
TCONS_00175261	ENSSSCG00000021007
	ENSSSCG00000021287
	ENSSSCG00000035958
TCONS_00174501	ENSSSCG00000008183
	ENSSSCG00000038865
	ENSSSCG00000034715
	ENSSSCG00000008186
	ENSSSCG00000037588
TCONS_00264872	ENSSSCG00000002386
	ENSSSCG00000002385
	ENSSSCG00000025984
TCONS_00017865	ENSSSCG00000039598
	ENSSSCG00000004134
	ENSSSCG00000004132
	ENSSSCG00000004133
TCONS_00252186	ENSSSCG00000001736
	ENSSSCG00000001735
	ENSSSCG00000024347
	ENSSSCG00000001739
	ENSSSCG00000001738
TCONS_00132536	ENSSSCG00000025799
	ENSSSCG00000026893
	ENSSSCG00000044384
TCONS_00154929	ENSSSCG00000014121
	ENSSSCG00000014123
	ENSSSCG00000014124
	ENSSSCG00000014126
	ENSSSCG00000031117
TCONS_00239894	ENSSSCG00000022672
	ENSSSCG00000031086
	ENSSSCG00000023792
	ENSSSCG00000038264
	ENSSSCG00000022324
	ENSSSCG00000044760
	ENSSSCG00000044312
	ENSSSCG00000003154
	ENSSSCG00000003157
	ENSSSCG00000003156
	ENSSSCG00000003152
	ENSSSCG00000003160
	ENSSSCG00000003159
TCONS_00152822	ENSSSCG00000048729
	ENSSSCG00000037685
	ENSSSCG00000047024
	ENSSSCG00000041942
	ENSSSCG00000022738
	ENSSSCG00000041029
	ENSSSCG00000031931
	ENSSSCG00000047812
	ENSSSCG00000046019
	ENSSSCG00000046137
TCONS_00290219	ENSSSCG00000015607
	ENSSSCG00000026404
	ENSSSCG00000015610
TCONS_00307967	ENSSSCG00000012126
	ENSSSCG00000012124
	ENSSSCG00000012125
	ENSSSCG00000012122
	ENSSSCG00000012123
TCONS_00000237	ENSSSCG00000027404
	ENSSSCG00000032403
	ENSSSCG00000024562
TCONS_00062238	ENSSSCG00000026818
	ENSSSCG00000022395
	ENSSSCG00000028788
	ENSSSCG00000049011
	ENSSSCG00000034868
	ENSSSCG00000028924
	ENSSSCG00000038726
	ENSSSCG00000017983
	ENSSSCG00000017982
	ENSSSCG00000017981
	ENSSSCG00000017980
	ENSSSCG00000027528
TCONS_00065197	ENSSSCG00000040581
	ENSSSCG00000048288
	ENSSSCG00000025272
	ENSSSCG00000011415
	ENSSSCG00000011412
	ENSSSCG00000037433
TCONS_00174795	ENSSSCG00000008226
	ENSSSCG00000023710
	ENSSSCG00000021746
	ENSSSCG00000008225
	ENSSSCG00000024564
ENSSSCT00000082857	ENSSSCG00000004314
	ENSSSCG00000039953
	ENSSSCG00000032781
	ENSSSCG00000046419
	ENSSSCG00000004311
TCONS_00144414	ENSSSCG00000016403
	ENSSSCG00000038486
	ENSSSCG00000028169
	ENSSSCG00000016406
TCONS_00173537	ENSSSCG00000007973
	ENSSSCG00000007970
	ENSSSCG00000007962
TCONS_00204933	XLOC_132192
	ENSSSCG00000006704
	ENSSSCG00000006703
	ENSSSCG00000006702
	ENSSSCG00000006701
TCONS_00052227	ENSSSCG00000020967
	ENSSSCG00000033918
	ENSSSCG00000040989
	ENSSSCG00000043974
	ENSSSCG00000026789
	ENSSSCG00000027923
	ENSSSCG00000021724
	ENSSSCG00000024357
	ENSSSCG00000017235
	ENSSSCG00000017237
	ENSSSCG00000017236
TCONS_00079146	ENSSSCG00000023225
	ENSSSCG00000011579
	ENSSSCG00000033000
TCONS_00259197	ENSSSCG00000001232
	ENSSSCG00000001233
	ENSSSCG00000001234
	ENSSSCG00000001235
	ENSSSCG00000001229
	ENSSSCG00000001342
	ENSSSCG00000001341
	ENSSSCG00000044574
	ENSSSCG00000041364
	ENSSSCG00000024161
TCONS_00227333	ENSSSCG00000033985
	ENSSSCG00000034329
	ENSSSCG00000040725
	ENSSSCG00000029156
	ENSSSCG00000032405
	XLOC_160477
	ENSSSCG00000037024
	ENSSSCG00000039460
	ENSSSCG00000035417
	ENSSSCG00000049623
	ENSSSCG00000025343
	ENSSSCG00000032656
	ENSSSCG00000035612
	ENSSSCG00000033532
	ENSSSCG00000035344
	ENSSSCG00000035924
	ENSSSCG00000037140
TCONS_00234841	ENSSSCG00000002639
	ENSSSCG00000002633
	ENSSSCG00000036102
	ENSSSCG00000029761
	ENSSSCG00000002637
	ENSSSCG00000002640
	ENSSSCG00000002635
	ENSSSCG00000026662
	ENSSSCG00000020924
TCONS_00102143	ENSSSCG00000043778
	ENSSSCG00000010369
	ENSSSCG00000031180
	ENSSSCG00000040893
	ENSSSCG00000010370
TCONS_00222052	ENSSSCG00000002633
	ENSSSCG00000002637
	ENSSSCG00000029761
	ENSSSCG00000026662
TCONS_00152805	ENSSSCG00000048729
	ENSSSCG00000037685
	ENSSSCG00000047024
	ENSSSCG00000041942
	ENSSSCG00000022738
	ENSSSCG00000047360
	ENSSSCG00000041029
	ENSSSCG00000031931
	ENSSSCG00000044550
	ENSSSCG00000047812
	ENSSSCG00000046019
	ENSSSCG00000046137
TCONS_00014708	ENSSSCG00000022780
	ENSSSCG00000005465
	ENSSSCG00000005463
TCONS_00058865	ENSSSCG00000017305
	ENSSSCG00000017307
	ENSSSCG00000017306
	ENSSSCG00000017310
	ENSSSCG00000017308
	ENSSSCG00000049121
TCONS_00116930	ENSSSCG00000033236
	ENSSSCG00000015844
	ENSSSCG00000015845
	ENSSSCG00000015846
	ENSSSCG00000047196
	ENSSSCG00000015843
TCONS_00101632	ENSSSCG00000035523
	ENSSSCG00000010308
	ENSSSCG00000010309
	ENSSSCG00000010311
	ENSSSCG00000010300
	ENSSSCG00000010301
	ENSSSCG00000010302
	ENSSSCG00000010303
	ENSSSCG00000010304
	ENSSSCG00000010306
	ENSSSCG00000010310
TCONS_00194988	ENSSSCG00000006398
	ENSSSCG00000006399
	ENSSSCG00000006403
	ENSSSCG00000006394
	ENSSSCG00000006397
	ENSSSCG00000033585
TCONS_00104439	ENSSSCG00000032968
	ENSSSCG00000031789
	ENSSSCG00000010635
TCONS_00250336	ENSSSCG00000001232
	ENSSSCG00000001233
	ENSSSCG00000001229
	ENSSSCG00000001341
	ENSSSCG00000044574
	ENSSSCG00000041364
	ENSSSCG00000024161
TCONS_00133266	ENSSSCG00000007094
	ENSSSCG00000007095
	ENSSSCG00000007097
	ENSSSCG00000007098
	ENSSSCG00000025589
	ENSSSCG00000029494
TCONS_00268661	ENSSSCG00000042145
	ENSSSCG00000008892
	ENSSSCG00000047751
TCONS_00132019	ENSSSCG00000006988
	ENSSSCG00000036785
	ENSSSCG00000006987
TCONS_00250104	ENSSSCG00000033566
	ENSSSCG00000049262
	ENSSSCG00000037682
	ENSSSCG00000047079
	ENSSSCG00000041733
	ENSSSCG00000001137
	ENSSSCG00000031751
	ENSSSCG00000001131
	ENSSSCG00000033672
	ENSSSCG00000051689
	ENSSSCG00000036727
	ENSSSCG00000021411
	ENSSSCG00000040540
	ENSSSCG00000047152
	ENSSSCG00000033606
	ENSSSCG00000045769
	ENSSSCG00000047841
	ENSSSCG00000035153
TCONS_00109243	ENSSSCG00000015883
	ENSSSCG00000036050
	ENSSSCG00000021956
TCONS_00252520	ENSSSCG00000001786
	ENSSSCG00000001787
	ENSSSCG00000037209
	ENSSSCG00000021587
	ENSSSCG00000038929
TCONS_00120002	ENSSSCG00000031271
	ENSSSCG00000016104
	ENSSSCG00000045151
	ENSSSCG00000016107
	ENSSSCG00000044765
TCONS_00089579	ENSSSCG00000009834
	ENSSSCG00000040595
	ENSSSCG00000009831
	ENSSSCG00000009832
	ENSSSCG00000009833
TCONS_00129575	ENSSSCG00000016975
	ENSSSCG00000046085
	ENSSSCG00000016976
	ENSSSCG00000023818
TCONS_00234525	ENSSSCG00000028485
	ENSSSCG00000021745
	ENSSSCG00000023920
	ENSSSCG00000027374
	ENSSSCG00000003964
	ENSSSCG00000039678
	ENSSSCG00000040559
	ENSSSCG00000034921
TCONS_00089981	ENSSSCG00000009888
	ENSSSCG00000044177
	ENSSSCG00000009887
	ENSSSCG00000009893
TCONS_00048405	ENSSSCG00000048332
	ENSSSCG00000023738
	ENSSSCG00000040929
TCONS_00306728	ENSSSCG00000005830
	ENSSSCG00000005841
	ENSSSCG00000005832
	ENSSSCG00000038203
	ENSSSCG00000005835
	ENSSSCG00000005836
	ENSSSCG00000040845
	ENSSSCG00000005838
	ENSSSCG00000005839
	ENSSSCG00000032001
	ENSSSCG00000005837
	ENSSSCG00000040080
	ENSSSCG00000005828
	ENSSSCG00000040396
	ENSSSCG00000005840
	ENSSSCG00000005842
	XLOC_205716
	ENSSSCG00000021963
	ENSSSCG00000005834
	ENSSSCG00000038233
	ENSSSCG00000040164
TCONS_00316036	ENSSSCG00000038423
	ENSSSCG00000039046
	ENSSSCG00000012494
	ENSSSCG00000034821
	ENSSSCG00000033161
	ENSSSCG00000026742
	ENSSSCG00000012493
	ENSSSCG00000038569
TCONS_00205376	ENSSSCG00000034581
	ENSSSCG00000006770
	ENSSSCG00000006771
	ENSSSCG00000006774
	ENSSSCG00000042304
TCONS_00250121	ENSSSCG00000001132
	ENSSSCG00000049262
	ENSSSCG00000020696
	ENSSSCG00000041733
	ENSSSCG00000001137
	ENSSSCG00000031751
	ENSSSCG00000001131
	ENSSSCG00000033672
	ENSSSCG00000051689
	ENSSSCG00000036727
	ENSSSCG00000021411
	ENSSSCG00000040540
	ENSSSCG00000047152
	ENSSSCG00000033606
	ENSSSCG00000047841
TCONS_00008058	ENSSSCG00000026900
	ENSSSCG00000042387
	ENSSSCG00000048762
TCONS_00028382	ENSSSCG00000005174
	ENSSSCG00000005170
	ENSSSCG00000005173
	ENSSSCG00000035863
	ENSSSCG00000040408
	ENSSSCG00000045652
	ENSSSCG00000044125
TCONS_00099109	ENSSSCG00000009935
	ENSSSCG00000009934
	ENSSSCG00000009931
	ENSSSCG00000009933
	ENSSSCG00000009932
TCONS_00099710	ENSSSCG00000010039
	ENSSSCG00000033879
	ENSSSCG00000030830
	ENSSSCG00000025508
	ENSSSCG00000048147
	ENSSSCG00000038719
	ENSSSCG00000035443
	ENSSSCG00000037214
	ENSSSCG00000034651
	ENSSSCG00000040522
	ENSSSCG00000039180
	ENSSSCG00000032042
	ENSSSCG00000031037
	ENSSSCG00000036408
	ENSSSCG00000042270
ENSSSCT00000084875	ENSSSCG00000051112
	ENSSSCG00000049241
	ENSSSCG00000005869
	ENSSSCG00000038314
TCONS_00094116	ENSSSCG00000046471
	ENSSSCG00000010504
	ENSSSCG00000010502
	ENSSSCG00000010503
TCONS_00072647	ENSSSCG00000011970
	ENSSSCG00000049101
	ENSSSCG00000011972
	ENSSSCG00000011973
TCONS_00180617	ENSSSCG00000026653
	ENSSSCG00000007656
	ENSSSCG00000007652
	ENSSSCG00000030337
	ENSSSCG00000023680
	ENSSSCG00000025164
	ENSSSCG00000007659
ENSSSCT00000078282	ENSSSCG00000023269
	ENSSSCG00000022882
	ENSSSCG00000027954
TCONS_00215322	ENSSSCG00000000091
	ENSSSCG00000000092
	ENSSSCG00000040334
TCONS_00208233	ENSSSCG00000000152
	ENSSSCG00000039706
	ENSSSCG00000000148
TCONS_00182795	ENSSSCG00000008055
	ENSSSCG00000008054
	ENSSSCG00000008057
	ENSSSCG00000008056
	ENSSSCG00000026326
	ENSSSCG00000027098
	ENSSSCG00000008058
	ENSSSCG00000037719
TCONS_00214071	ENSSSCG00000051097
	ENSSSCG00000000925
	ENSSSCG00000000924
	ENSSSCG00000000927
	ENSSSCG00000000926
TCONS_00282800	ENSSSCG00000014872
	ENSSSCG00000032723
	ENSSSCG00000014871
	XLOC_195083
TCONS_00207873	ENSSSCG00000000077
	ENSSSCG00000000076
	ENSSSCG00000000075
	ENSSSCG00000000074
	ENSSSCG00000000072
TCONS_00016061	ENSSSCG00000005724
	ENSSSCG00000005725
	ENSSSCG00000005723
ENSSSCT00000088344	ENSSSCG00000017395
	ENSSSCG00000040866
	ENSSSCG00000037487
	ENSSSCG00000017389
	ENSSSCG00000017385
	ENSSSCG00000017384
	ENSSSCG00000017386
	XLOC_041427
	ENSSSCG00000017393
	ENSSSCG00000017382
	ENSSSCG00000036106
	ENSSSCG00000044045
	ENSSSCG00000034782
	ENSSSCG00000017391
	ENSSSCG00000017392
TCONS_00297453	ENSSSCG00000028444
	ENSSSCG00000036452
	ENSSSCG00000043224
	ENSSSCG00000037822
	ENSSSCG00000015414
ENSSSCT00000072499	ENSSSCG00000022728
	ENSSSCG00000028104
	ENSSSCG00000038644
	ENSSSCG00000000279
	ENSSSCG00000000281
	ENSSSCG00000034474
TCONS_00234227	ENSSSCG00000003903
	ENSSSCG00000038280
	ENSSSCG00000003904
	ENSSSCG00000003905
	ENSSSCG00000003909
	ENSSSCG00000003908
	ENSSSCG00000029145
	ENSSSCG00000045959
	ENSSSCG00000026991
	ENSSSCG00000050383
TCONS_00210838	ENSSSCG00000000549
	ENSSSCG00000000547
	ENSSSCG00000000546
	ENSSSCG00000000545
TCONS_00152274	ENSSSCG00000013838
	ENSSSCG00000025560
	ENSSSCG00000023607
	ENSSSCG00000013836
	ENSSSCG00000013837
	ENSSSCG00000013839
	ENSSSCG00000027903
ENSSSCT00000067348	ENSSSCG00000021068
	ENSSSCG00000028293
	ENSSSCG00000040650
ENSSSCT00000077287	ENSSSCG00000004509
	ENSSSCG00000004510
	ENSSSCG00000043017
TCONS_00054349	ENSSSCG00000017561
	ENSSSCG00000017562
	ENSSSCG00000038760
	ENSSSCG00000017555
	ENSSSCG00000017556
	ENSSSCG00000017557
TCONS_00058503	ENSSSCG00000017261
	ENSSSCG00000017260
	ENSSSCG00000017259
	ENSSSCG00000017258
TCONS_00019692	ENSSSCG00000004293
	ENSSSCG00000004291
	ENSSSCG00000004294
ENSSSCT00000089867	ENSSSCG00000009215
	ENSSSCG00000009216
	ENSSSCG00000009217
	ENSSSCG00000009219
	ENSSSCG00000028730
TCONS_00121827	ENSSSCG00000036274
	ENSSSCG00000016306
	ENSSSCG00000016305
	ENSSSCG00000016313
	ENSSSCG00000028217
TCONS_00196211	XLOC_132192
	ENSSSCG00000006704
	ENSSSCG00000006703
	ENSSSCG00000006702
	ENSSSCG00000006701
ENSSSCT00000081116	ENSSSCG00000001574
	ENSSSCG00000001577
	ENSSSCG00000001576
	ENSSSCG00000001573
	ENSSSCG00000001572
TCONS_00205034	ENSSSCG00000027153
	ENSSSCG00000006725
	ENSSSCG00000006720
TCONS_00006838	ENSSSCG00000004626
	ENSSSCG00000004624
	ENSSSCG00000004625
	ENSSSCG00000004630
	ENSSSCG00000004628
	ENSSSCG00000004629
TCONS_00277087	ENSSSCG00000008899
	ENSSSCG00000032353
	ENSSSCG00000008903
	ENSSSCG00000008902
	ENSSSCG00000008901
	ENSSSCG00000008900
	ENSSSCG00000027403
	ENSSSCG00000043888
TCONS_00153059	ENSSSCG00000032282
	ENSSSCG00000013627
	ENSSSCG00000013625
	ENSSSCG00000013613
	ENSSSCG00000013615
	ENSSSCG00000013610
	ENSSSCG00000013617
	ENSSSCG00000013616
	ENSSSCG00000043957
	ENSSSCG00000013614
TCONS_00247538	ENSSSCG00000003868
	ENSSSCG00000003867
	ENSSSCG00000046753
	ENSSSCG00000003863
	ENSSSCG00000021036
	ENSSSCG00000038762
TCONS_00182796	ENSSSCG00000008055
	ENSSSCG00000008054
	ENSSSCG00000008057
	ENSSSCG00000008056
	ENSSSCG00000026326
	ENSSSCG00000027098
	ENSSSCG00000008058
	ENSSSCG00000037719
TCONS_00232416	ENSSSCG00000003760
	ENSSSCG00000026005
	ENSSSCG00000040920
	ENSSSCG00000041891
	ENSSSCG00000046184
	ENSSSCG00000051341
TCONS_00032432	ENSSSCG00000005724
	ENSSSCG00000005725
	ENSSSCG00000005723
TCONS_00096398	ENSSSCG00000010780
	ENSSSCG00000051608
	ENSSSCG00000010782
	ENSSSCG00000010779
	ENSSSCG00000049424
	ENSSSCG00000046090
ENSSSCT00000087681	ENSSSCG00000035671
	ENSSSCG00000040134
	ENSSSCG00000033762
	ENSSSCG00000034379
	ENSSSCG00000031802
	ENSSSCG00000034040
ENSSSCT00000076984	ENSSSCG00000010931
	ENSSSCG00000032993
	ENSSSCG00000010929
	ENSSSCG00000022787
	ENSSSCG00000048294
TCONS_00208286	ENSSSCG00000000158
	ENSSSCG00000000159
	ENSSSCG00000000156
	ENSSSCG00000040453
	ENSSSCG00000000157
TCONS_00202736	ENSSSCG00000031813
	ENSSSCG00000006251
	ENSSSCG00000006252
TCONS_00259004	ENSSSCG00000033566
	ENSSSCG00000037682
	ENSSSCG00000047079
	ENSSSCG00000041733
	ENSSSCG00000001137
	ENSSSCG00000033672
	ENSSSCG00000051689
	ENSSSCG00000021411
	ENSSSCG00000040540
	ENSSSCG00000033606
	ENSSSCG00000045769
	ENSSSCG00000035153
TCONS_00283757	ENSSSCG00000014972
	ENSSSCG00000034879
	ENSSSCG00000034924
TCONS_00230769	ENSSSCG00000003669
	ENSSSCG00000036395
	ENSSSCG00000036673
	ENSSSCG00000027902
	ENSSSCG00000003670
	ENSSSCG00000003672
TCONS_00148627	ENSSSCG00000012996
	ENSSSCG00000012995
	ENSSSCG00000012994
	ENSSSCG00000012993
	ENSSSCG00000012985
	ENSSSCG00000012984
	ENSSSCG00000012992
TCONS_00303966	ENSSSCG00000043890
	ENSSSCG00000016384
	ENSSSCG00000048464
TCONS_00019448	ENSSSCG00000004275
	ENSSSCG00000046534
	ENSSSCG00000004276
	ENSSSCG00000004274
TCONS_00297873	ENSSSCG00000030294
	ENSSSCG00000015453
	ENSSSCG00000015450
TCONS_00163277	ENSSSCG00000013938
	ENSSSCG00000036970
	ENSSSCG00000030351
	ENSSSCG00000044084
	ENSSSCG00000048260
	ENSSSCG00000032131
	ENSSSCG00000023658
	ENSSSCG00000036310
	ENSSSCG00000021664
	ENSSSCG00000034887
TCONS_00175643	ENSSSCG00000008334
	ENSSSCG00000008335
	ENSSSCG00000008336
	ENSSSCG00000025674
TCONS_00204260	ENSSSCG00000006552
	ENSSSCG00000006553
	ENSSSCG00000006550
	ENSSSCG00000006551
	ENSSSCG00000006556
	ENSSSCG00000006554
	ENSSSCG00000006555
	ENSSSCG00000027628
ENSSSCT00000077323	ENSSSCG00000031278
	ENSSSCG00000031808
	ENSSSCG00000009516
TCONS_00150907	ENSSSCG00000013362
	ENSSSCG00000013361
	ENSSSCG00000013360
	ENSSSCG00000013358
	ENSSSCG00000041063
	ENSSSCG00000038037
TCONS_00292325	ENSSSCG00000014915
	ENSSSCG00000014917
	ENSSSCG00000021210
	ENSSSCG00000014913
TCONS_00215131	ENSSSCG00000000059
	ENSSSCG00000000058
	ENSSSCG00000034265
	ENSSSCG00000000061
	ENSSSCG00000000062
	ENSSSCG00000000063
	ENSSSCG00000000064
	ENSSSCG00000034405
ENSSSCT00000082616	ENSSSCG00000038110
	ENSSSCG00000014310
	ENSSSCG00000014307
	ENSSSCG00000014309
	ENSSSCG00000043471
TCONS_00283679	ENSSSCG00000014960
	ENSSSCG00000014961
	ENSSSCG00000031376
ENSSSCT00000081197	ENSSSCG00000041949
	ENSSSCG00000048881
	ENSSSCG00000049818
	ENSSSCG00000033487
	ENSSSCG00000044726
	ENSSSCG00000028385
TCONS_00303614	ENSSSCG00000002544
	ENSSSCG00000002547
	ENSSSCG00000034738
	ENSSSCG00000040945
	ENSSSCG00000002546
	ENSSSCG00000021669
	ENSSSCG00000021220
	ENSSSCG00000031003
	ENSSSCG00000037197
TCONS_00133075	ENSSSCG00000007072
	ENSSSCG00000007073
	ENSSSCG00000007074
TCONS_00043392	ENSSSCG00000021818
	ENSSSCG00000009426
	ENSSSCG00000009425
TCONS_00055336	ENSSSCG00000017747
	ENSSSCG00000017749
	ENSSSCG00000017748
	ENSSSCG00000017750
	ENSSSCG00000017751
TCONS_00062250	ENSSSCG00000026818
	ENSSSCG00000022395
	ENSSSCG00000028048
	ENSSSCG00000028924
	ENSSSCG00000034868
	ENSSSCG00000049011
	ENSSSCG00000038726
	ENSSSCG00000028166
	ENSSSCG00000017983
	ENSSSCG00000017982
	ENSSSCG00000017981
	ENSSSCG00000027528
	ENSSSCG00000028788
TCONS_00026169	ENSSSCG00000004936
	ENSSSCG00000004937
	ENSSSCG00000004935
	ENSSSCG00000004938
TCONS_00186356	ENSSSCG00000047389
	ENSSSCG00000008410
	ENSSSCG00000025224
TCONS_00282098	ENSSSCG00000034680
	ENSSSCG00000044433
	ENSSSCG00000051672
	ENSSSCG00000043379
	ENSSSCG00000037537
	ENSSSCG00000034777
	ENSSSCG00000014693
	ENSSSCG00000051031
	ENSSSCG00000014695
	ENSSSCG00000027874
	ENSSSCG00000034855
TCONS_00227721	ENSSSCG00000049941
	ENSSSCG00000035527
	ENSSSCG00000047003
	ENSSSCG00000032352
	ENSSSCG00000043116
	ENSSSCG00000038009
	ENSSSCG00000036554
	ENSSSCG00000003990
TCONS_00247860	ENSSSCG00000028097
	ENSSSCG00000040796
	ENSSSCG00000034035
	ENSSSCG00000029256
	ENSSSCG00000037354
	ENSSSCG00000021448
	ENSSSCG00000035907
	ENSSSCG00000046843
	ENSSSCG00000029573
	ENSSSCG00000003914
TCONS_00149488	ENSSSCG00000013178
	ENSSSCG00000032364
	ENSSSCG00000013176
	ENSSSCG00000013177
	ENSSSCG00000013174
	ENSSSCG00000013175
	ENSSSCG00000013173
	ENSSSCG00000037892
	ENSSSCG00000031442
TCONS_00303088	ENSSSCG00000002528
	ENSSSCG00000039713
	ENSSSCG00000051546
	ENSSSCG00000002530
	ENSSSCG00000002531
	ENSSSCG00000002532
	ENSSSCG00000002533
TCONS_00208232	ENSSSCG00000000152
	ENSSSCG00000039706
	ENSSSCG00000000148
TCONS_00058603	ENSSSCG00000037202
	ENSSSCG00000017271
	ENSSSCG00000017272
TCONS_00126234	ENSSSCG00000017086
	ENSSSCG00000017087
	ENSSSCG00000017089
	ENSSSCG00000040411
	ENSSSCG00000038877
TCONS_00254780	ENSSSCG00000038172
	ENSSSCG00000002134
	ENSSSCG00000002135
	ENSSSCG00000002138
	ENSSSCG00000002140
	ENSSSCG00000002143
	ENSSSCG00000002142
	ENSSSCG00000002144
	ENSSSCG00000039240
	ENSSSCG00000040060
TCONS_00165639	ENSSSCG00000014019
	ENSSSCG00000014021
	ENSSSCG00000014020
	ENSSSCG00000014023
	ENSSSCG00000014022
TCONS_00310567	ENSSSCG00000012485
	ENSSSCG00000012484
	ENSSSCG00000012487
	ENSSSCG00000012486
TCONS_00047779	ENSSSCG00000009380
	ENSSSCG00000035658
	ENSSSCG00000009379
	ENSSSCG00000009378
	ENSSSCG00000009377
	ENSSSCG00000047038
	ENSSSCG00000009374
	ENSSSCG00000009373
TCONS_00078996	ENSSSCG00000033624
	ENSSSCG00000011540
	ENSSSCG00000011542
TCONS_00291514	ENSSSCG00000014843
	ENSSSCG00000021702
	ENSSSCG00000021822
TCONS_00310666	ENSSSCG00000031196
	ENSSSCG00000012520
	ENSSSCG00000012519
	ENSSSCG00000012518
	ENSSSCG00000012521
	ENSSSCG00000012516
TCONS_00015186	ENSSSCG00000005524
	ENSSSCG00000038200
	ENSSSCG00000005519
	ENSSSCG00000005518
TCONS_00162427	ENSSSCG00000013376
	ENSSSCG00000013374
	ENSSSCG00000013375
	ENSSSCG00000042767
TCONS_00167919	ENSSSCG00000014214
	ENSSSCG00000014215
	ENSSSCG00000029866
TCONS_00138523	ENSSSCG00000007275
	ENSSSCG00000043286
	ENSSSCG00000026617
