# Supplementary material for: Integrated Analysis of Long Non-Coding RNA and mRNA to Reveal Putative Candidate Genes Associated with Backfat Quality in Beijing Black Pig
Source: Foods. 2022 Nov 15;11(22):3654. doi: 10.3390/foods11223654 (PMC9689697; doi:10.3390/foods11223654)
Supplement: Supplementary file 1 [file foods-11-03654-s001.zip › Table S7.xlsx]

## Sheet: 反式靶基因
Num	ID	ID_2	CorrelationCoefficient	p-value
1	TCONS_00318985	ENSSSCG00000014318	1	4.85e-10
2	ENSSSCT00000083231	ENSSSCG00000007836	1	5.559e-10
3	TCONS_00014708	ENSSSCG00000004662	1	8.319e-10
4	ENSSSCT00000076488	ENSSSCG00000043963	1	1.157e-09
5	TCONS_00256285	ENSSSCG00000001444	0.9999	4.198e-09
6	TCONS_00302231	ENSSSCG00000029311	0.9999	9.229e-09
7	ENSSSCT00000069893	ENSSSCG00000005193	0.9999	9.677e-09
8	ENSSSCT00000066614	ENSSSCG00000015903	0.9999	1.044e-08
9	TCONS_00222052	ENSSSCG00000017932	0.9999	1.511e-08
10	ENSSSCT00000076421	ENSSSCG00000011078	0.9999	3.054e-08
11	TCONS_00318985	ENSSSCG00000003748	0.9998	4.613e-08
12	TCONS_00318985	ENSSSCG00000011627	0.9998	5.359e-08
13	TCONS_00252520	ENSSSCG00000026985	0.9998	5.615e-08
14	TCONS_00252520	ENSSSCG00000048668	0.9998	5.731e-08
15	TCONS_00302231	ENSSSCG00000033229	0.9998	6.311e-08
16	TCONS_00044203	ENSSSCG00000034726	0.9998	6.313e-08
17	TCONS_00202838	ENSSSCG00000004453	0.9998	7.459e-08
18	ENSSSCT00000040455	ENSSSCG00000015926	0.9998	7.598e-08
19	TCONS_00310567	ENSSSCG00000037497	0.9997	1.044e-07
20	TCONS_00154929	ENSSSCG00000033229	0.9997	1.325e-07
21	ENSSSCT00000086043	ENSSSCG00000016384	0.9996	1.918e-07
22	TCONS_00186356	ENSSSCG00000030271	0.9996	2.594e-07
23	ENSSSCT00000084875	ENSSSCG00000028942	0.9996	2.599e-07
24	TCONS_00154929	ENSSSCG00000046748	0.9995	3.234e-07
25	TCONS_00318985	ENSSSCG00000015741	0.9995	3.272e-07
26	ENSSSCT00000080396	ENSSSCG00000031944	0.9995	3.307e-07
27	TCONS_00278134	ENSSSCG00000012272	0.9995	3.493e-07
28	TCONS_00120002	ENSSSCG00000011751	0.9995	3.664e-07
29	TCONS_00033154	ENSSSCG00000002632	0.9995	4.105e-07
30	TCONS_00283679	ENSSSCG00000040843	0.9995	4.226e-07
31	TCONS_00100915	ENSSSCG00000037676	0.9994	4.641e-07
32	TCONS_00028382	ENSSSCG00000045652	0.9994	4.852e-07
33	TCONS_00175643	ENSSSCG00000021093	0.9994	4.878e-07
34	TCONS_00054349	ENSSSCG00000008624	0.9994	5.606e-07
35	TCONS_00120002	ENSSSCG00000022525	0.9994	5.683e-07
36	TCONS_00089579	ENSSSCG00000016153	0.9994	5.756e-07
37	ENSSSCT00000085552	ENSSSCG00000032902	0.9994	5.841e-07
38	TCONS_00318670	ENSSSCG00000032902	0.9994	6.022e-07
39	TCONS_00252520	ENSSSCG00000040130	0.9993	6.606e-07
40	ENSSSCT00000088568	ENSSSCG00000005986	0.9993	7.642e-07
41	TCONS_00158142	ENSSSCG00000022525	0.9993	8.073e-07
42	TCONS_00300482	ENSSSCG00000048009	0.9992	8.467e-07
43	ENSSSCT00000081197	ENSSSCG00000022525	0.9992	8.664e-07
44	ENSSSCT00000077323	ENSSSCG00000011078	0.9992	9.065e-07
45	TCONS_00140798	ENSSSCG00000040770	0.9992	9.094e-07
46	TCONS_00259203	ENSSSCG00000032054	0.9992	9.643e-07
47	TCONS_00140808	ENSSSCG00000016671	0.9992	9.747e-07
48	TCONS_00202838	ENSSSCG00000034919	0.9992	1.069e-06
49	ENSSSCT00000074832	ENSSSCG00000028942	0.9992	1.078e-06
50	ENSSSCT00000083260	ENSSSCG00000033229	0.9992	1.08e-06
51	TCONS_00151368	ENSSSCG00000016239	0.9991	1.085e-06
52	ENSSSCT00000083260	ENSSSCG00000011751	0.9991	1.106e-06
53	TCONS_00278134	ENSSSCG00000020859	0.9991	1.125e-06
54	TCONS_00305190	ENSSSCG00000047560	0.9991	1.228e-06
55	ENSSSCT00000085552	ENSSSCG00000016384	0.9991	1.242e-06
56	TCONS_00300468	ENSSSCG00000040714	0.9991	1.253e-06
57	ENSSSCT00000074880	ENSSSCG00000010617	0.9991	1.315e-06
58	ENSSSCT00000077447	ENSSSCG00000032810	0.9991	1.326e-06
59	ENSSSCT00000088091	ENSSSCG00000043963	0.999	1.378e-06
60	TCONS_00318985	ENSSSCG00000016671	0.999	1.412e-06
61	TCONS_00173537	ENSSSCG00000011751	0.999	1.42e-06
62	TCONS_00281166	ENSSSCG00000005193	0.999	1.421e-06
63	ENSSSCT00000072303	ENSSSCG00000011078	0.999	1.463e-06
64	TCONS_00173537	ENSSSCG00000022525	0.999	1.492e-06
65	TCONS_00250705	ENSSSCG00000023296	0.999	1.518e-06
66	ENSSSCT00000074832	ENSSSCG00000043963	0.999	1.518e-06
67	TCONS_00259203	ENSSSCG00000015395	0.999	1.519e-06
68	TCONS_00304616	ENSSSCG00000028942	0.999	1.532e-06
69	TCONS_00304212	ENSSSCG00000046241	0.999	1.559e-06
70	TCONS_00261208	ENSSSCG00000040714	0.999	1.57e-06
71	TCONS_00300481	ENSSSCG00000016110	0.999	1.602e-06
72	ENSSSCT00000072852	ENSSSCG00000016110	0.999	1.614e-06
73	ENSSSCT00000086043	ENSSSCG00000032902	0.9989	1.658e-06
74	ENSSSCT00000089867	ENSSSCG00000021585	0.9989	1.668e-06
75	ENSSSCT00000077447	ENSSSCG00000016288	0.9989	1.747e-06
76	TCONS_00065939	ENSSSCG00000027928	0.9989	1.748e-06
77	TCONS_00154929	ENSSSCG00000029311	0.9989	1.788e-06
78	ENSSSCT00000083231	ENSSSCG00000026061	0.9989	1.815e-06
79	TCONS_00163277	ENSSSCG00000023393	0.9989	1.826e-06
80	TCONS_00318412	ENSSSCG00000022525	0.9989	1.829e-06
81	ENSSSCT00000066614	ENSSSCG00000023393	0.9989	1.84e-06
82	ENSSSCT00000076488	ENSSSCG00000023393	0.9989	1.853e-06
83	ENSSSCT00000083260	ENSSSCG00000022525	0.9989	1.955e-06
84	ENSSSCT00000088568	ENSSSCG00000010536	0.9989	1.959e-06
85	TCONS_00318670	ENSSSCG00000016384	0.9988	1.997e-06
86	TCONS_00093273	ENSSSCG00000009216	0.9988	1.999e-06
87	TCONS_00167919	ENSSSCG00000015395	0.9988	2.025e-06
88	TCONS_00290219	ENSSSCG00000034495	0.9988	2.059e-06
89	TCONS_00173537	ENSSSCG00000033229	0.9988	2.093e-06
90	TCONS_00163277	ENSSSCG00000043963	0.9988	2.176e-06
91	ENSSSCT00000066614	ENSSSCG00000030371	0.9988	2.204e-06
92	TCONS_00202736	ENSSSCG00000002478	0.9988	2.228e-06
93	TCONS_00140808	ENSSSCG00000029311	0.9987	2.493e-06
94	TCONS_00207873	ENSSSCG00000014038	0.9987	2.507e-06
95	ENSSSCT00000074832	ENSSSCG00000036046	0.9987	2.512e-06
96	TCONS_00158142	ENSSSCG00000011751	0.9987	2.557e-06
97	ENSSSCT00000066614	ENSSSCG00000051740	0.9987	2.725e-06
98	ENSSSCT00000066614	ENSSSCG00000036046	0.9987	2.729e-06
99	TCONS_00126234	ENSSSCG00000008533	0.9986	2.79e-06
100	TCONS_00154929	ENSSSCG00000011751	0.9986	2.804e-06
101	ENSSSCT00000080518	ENSSSCG00000016384	0.9986	2.857e-06
102	TCONS_00196211	ENSSSCG00000022525	0.9986	3.127e-06
103	TCONS_00167919	ENSSSCG00000026985	0.9986	3.135e-06
104	TCONS_00060668	ENSSSCG00000035762	-0.9985	3.166e-06
105	TCONS_00259203	ENSSSCG00000022261	0.9985	3.328e-06
106	TCONS_00052227	ENSSSCG00000047560	0.9985	3.365e-06
107	ENSSSCT00000052237	ENSSSCG00000021176	0.9985	3.416e-06
108	TCONS_00163277	ENSSSCG00000015903	0.9985	3.494e-06
109	ENSSSCT00000089505	ENSSSCG00000022525	0.9984	3.681e-06
110	TCONS_00052227	ENSSSCG00000003797	0.9984	3.71e-06
111	ENSSSCT00000086722	ENSSSCG00000044903	0.9984	3.733e-06
112	TCONS_00318985	ENSSSCG00000015917	0.9984	3.802e-06
113	ENSSSCT00000083210	ENSSSCG00000031944	0.9984	3.843e-06
114	ENSSSCT00000040455	ENSSSCG00000000528	0.9984	3.881e-06
115	TCONS_00196211	ENSSSCG00000033229	0.9984	3.885e-06
116	TCONS_00058603	ENSSSCG00000010682	-0.9984	3.97e-06
117	ENSSSCT00000066614	ENSSSCG00000043963	0.9984	3.979e-06
118	TCONS_00276112	ENSSSCG00000000854	0.9983	4.104e-06
119	TCONS_00174501	ENSSSCG00000011751	0.9983	4.242e-06
120	TCONS_00099710	ENSSSCG00000032057	0.9983	4.304e-06
121	TCONS_00174501	ENSSSCG00000022525	0.9983	4.353e-06
122	TCONS_00065197	ENSSSCG00000045652	0.9983	4.363e-06
123	TCONS_00151368	ENSSSCG00000004662	0.9983	4.447e-06
124	ENSSSCT00000082339	ENSSSCG00000020859	0.9983	4.471e-06
125	TCONS_00054349	ENSSSCG00000012326	-0.9983	4.504e-06
126	TCONS_00196211	ENSSSCG00000011751	0.9983	4.529e-06
127	TCONS_00175044	ENSSSCG00000035518	0.9983	4.536e-06
128	TCONS_00140808	ENSSSCG00000033229	0.9983	4.544e-06
129	TCONS_00111522	ENSSSCG00000015795	0.9982	4.602e-06
130	ENSSSCT00000090939	ENSSSCG00000004225	0.9982	4.613e-06
131	TCONS_00302231	ENSSSCG00000046748	0.9982	4.717e-06
132	TCONS_00140803	ENSSSCG00000015795	0.9982	4.724e-06
133	ENSSSCT00000083231	ENSSSCG00000046748	0.9982	4.727e-06
134	TCONS_00008058	ENSSSCG00000015395	0.9982	4.75e-06
135	TCONS_00278134	ENSSSCG00000017411	0.9982	4.775e-06
136	ENSSSCT00000083260	ENSSSCG00000029311	0.9982	4.924e-06
137	ENSSSCT00000076488	ENSSSCG00000015903	0.9982	4.943e-06
138	TCONS_00232121	ENSSSCG00000005986	0.9982	4.981e-06
139	TCONS_00014708	ENSSSCG00000016239	0.9981	5.161e-06
140	ENSSSCT00000040455	ENSSSCG00000004819	0.9981	5.288e-06
141	TCONS_00099710	ENSSSCG00000016627	0.9981	5.316e-06
142	TCONS_00302231	ENSSSCG00000016671	0.9981	5.332e-06
143	TCONS_00014708	ENSSSCG00000009216	0.9981	5.387e-06
144	ENSSSCT00000083231	ENSSSCG00000044903	0.9981	5.43e-06
145	TCONS_00261208	ENSSSCG00000044903	0.9981	5.432e-06
146	ENSSSCT00000089867	ENSSSCG00000026594	0.9981	5.532e-06
147	ENSSSCT00000081197	ENSSSCG00000011751	0.9981	5.573e-06
148	TCONS_00140798	ENSSSCG00000044445	0.998	5.93e-06
149	TCONS_00318672	ENSSSCG00000022525	0.998	6.144e-06
150	TCONS_00121827	ENSSSCG00000028217	0.998	6.26e-06
151	TCONS_00150907	ENSSSCG00000038824	0.998	6.297e-06
152	TCONS_00252186	ENSSSCG00000002298	0.9979	6.411e-06
153	TCONS_00246231	ENSSSCG00000016110	0.9979	6.427e-06
154	ENSSSCT00000074832	ENSSSCG00000030371	0.9979	6.612e-06
155	TCONS_00054408	ENSSSCG00000037497	0.9979	6.629e-06
156	TCONS_00301114	ENSSSCG00000010903	0.9979	6.633e-06
157	TCONS_00094048	ENSSSCG00000043223	0.9979	6.916e-06
158	TCONS_00300838	ENSSSCG00000015926	0.9978	6.938e-06
159	TCONS_00063482	ENSSSCG00000003732	0.9978	6.95e-06
160	TCONS_00102241	ENSSSCG00000002478	0.9978	7.032e-06
161	ENSSSCT00000047216	ENSSSCG00000004191	0.9978	7.085e-06
162	TCONS_00173537	ENSSSCG00000029311	0.9978	7.208e-06
163	ENSSSCT00000071270	ENSSSCG00000027275	0.9978	7.219e-06
164	ENSSSCT00000084875	ENSSSCG00000036046	0.9978	7.404e-06
165	ENSSSCT00000083210	ENSSSCG00000010517	0.9978	7.425e-06
166	TCONS_00240274	ENSSSCG00000015903	0.9978	7.51e-06
167	TCONS_00054908	ENSSSCG00000045652	0.9978	7.52e-06
168	TCONS_00240274	ENSSSCG00000051740	0.9977	7.637e-06
169	ENSSSCT00000090542	ENSSSCG00000025108	0.9977	7.791e-06
170	ENSSSCT00000083260	ENSSSCG00000046748	0.9977	7.874e-06
171	TCONS_00140815	ENSSSCG00000008927	0.9977	7.947e-06
172	TCONS_00122607	ENSSSCG00000031944	0.9977	8.02e-06
173	TCONS_00140815	ENSSSCG00000016256	0.9977	8.244e-06
174	TCONS_00008058	ENSSSCG00000022261	0.9976	8.304e-06
175	TCONS_00093273	ENSSSCG00000016239	0.9976	8.474e-06
176	TCONS_00291514	ENSSSCG00000007979	0.9976	8.59e-06
177	TCONS_00122607	ENSSSCG00000010517	0.9976	8.607e-06
178	TCONS_00318672	ENSSSCG00000033229	0.9976	8.673e-06
179	TCONS_00196211	ENSSSCG00000029311	0.9976	8.692e-06
180	TCONS_00019692	ENSSSCG00000008241	0.9976	8.698e-06
181	TCONS_00091354	ENSSSCG00000011795	-0.9976	8.797e-06
182	ENSSSCT00000075678	ENSSSCG00000032153	0.9975	9.084e-06
183	TCONS_00182795	ENSSSCG00000038766	0.9975	9.101e-06
184	TCONS_00296587	ENSSSCG00000035518	0.9975	9.125e-06
185	TCONS_00300468	ENSSSCG00000015795	0.9975	9.146e-06
186	TCONS_00240274	ENSSSCG00000023393	0.9975	9.227e-06
187	TCONS_00132552	ENSSSCG00000002632	0.9975	9.265e-06
188	TCONS_00140808	ENSSSCG00000046748	0.9975	9.274e-06
189	ENSSSCT00000088344	ENSSSCG00000016288	0.9975	9.313e-06
190	TCONS_00132536	ENSSSCG00000022525	0.9975	9.35e-06
191	TCONS_00140801	ENSSSCG00000005199	0.9975	9.448e-06
192	TCONS_00028382	ENSSSCG00000035863	0.9975	9.54e-06
193	TCONS_00310567	ENSSSCG00000004075	0.9975	9.619e-06
194	ENSSSCT00000076488	ENSSSCG00000036046	0.9975	9.682e-06
195	ENSSSCT00000066614	ENSSSCG00000009498	0.9974	9.774e-06
196	ENSSSCT00000069026	ENSSSCG00000006979	0.9974	9.852e-06
197	TCONS_00284360	ENSSSCG00000007979	0.9974	9.882e-06
198	TCONS_00304616	ENSSSCG00000005193	0.9974	1.003e-05
199	TCONS_00222052	ENSSSCG00000028996	0.9974	1.018e-05
200	TCONS_00261206	ENSSSCG00000005067	0.9974	1.024e-05
201	TCONS_00238303	ENSSSCG00000005753	0.9974	1.039e-05
202	TCONS_00093273	ENSSSCG00000004662	0.9973	1.07e-05
203	TCONS_00089981	ENSSSCG00000001518	0.9973	1.105e-05
204	TCONS_00318672	ENSSSCG00000011751	0.9973	1.106e-05
205	ENSSSCT00000077447	ENSSSCG00000030908	0.9973	1.121e-05
206	TCONS_00173537	ENSSSCG00000046748	0.9972	1.173e-05
207	TCONS_00302231	ENSSSCG00000009941	0.9972	1.179e-05
208	TCONS_00272792	ENSSSCG00000006325	0.9972	1.183e-05
209	TCONS_00104439	ENSSSCG00000036746	-0.9972	1.184e-05
210	TCONS_00054349	ENSSSCG00000024149	-0.9972	1.195e-05
211	ENSSSCT00000084875	ENSSSCG00000043963	0.9972	1.195e-05
212	TCONS_00318412	ENSSSCG00000011751	0.9971	1.226e-05
213	ENSSSCT00000080518	ENSSSCG00000032902	0.9971	1.249e-05
214	TCONS_00140808	ENSSSCG00000003748	0.9971	1.251e-05
215	ENSSSCT00000072245	ENSSSCG00000040770	0.9971	1.259e-05
216	TCONS_00140808	ENSSSCG00000014318	0.9971	1.275e-05
217	ENSSSCT00000081414	ENSSSCG00000008927	0.9971	1.28e-05
218	TCONS_00043392	ENSSSCG00000038766	0.9971	1.284e-05
219	ENSSSCT00000069026	ENSSSCG00000039977	0.9971	1.294e-05
220	TCONS_00276112	ENSSSCG00000007436	0.9971	1.298e-05
221	TCONS_00173059	ENSSSCG00000010554	0.997	1.304e-05
222	ENSSSCT00000068579	ENSSSCG00000026260	0.997	1.32e-05
223	ENSSSCT00000052237	ENSSSCG00000031581	0.997	1.328e-05
224	ENSSSCT00000088091	ENSSSCG00000023393	0.997	1.334e-05
225	ENSSSCT00000082885	ENSSSCG00000003732	0.997	1.345e-05
226	TCONS_00208233	ENSSSCG00000017498	0.997	1.352e-05
227	TCONS_00304616	ENSSSCG00000036046	0.997	1.376e-05
228	TCONS_00154929	ENSSSCG00000007836	0.997	1.38e-05
229	TCONS_00318672	ENSSSCG00000029311	0.997	1.389e-05
230	TCONS_00099710	ENSSSCG00000045986	0.9969	1.403e-05
231	TCONS_00186356	ENSSSCG00000040403	0.9969	1.407e-05
232	TCONS_00044203	ENSSSCG00000042157	0.9969	1.42e-05
233	TCONS_00120002	ENSSSCG00000046748	0.9969	1.439e-05
234	TCONS_00234525	ENSSSCG00000039977	0.9969	1.441e-05
235	TCONS_00130818	ENSSSCG00000027609	0.9969	1.449e-05
236	TCONS_00194988	ENSSSCG00000037910	0.9969	1.464e-05
237	ENSSSCT00000076488	ENSSSCG00000030371	0.9969	1.472e-05
238	ENSSSCT00000082834	ENSSSCG00000040714	0.9969	1.475e-05
239	TCONS_00140808	ENSSSCG00000007836	0.9969	1.48e-05
240	ENSSSCT00000074832	ENSSSCG00000015903	0.9969	1.484e-05
241	ENSSSCT00000083210	ENSSSCG00000037032	0.9968	1.491e-05
242	TCONS_00232121	ENSSSCG00000025986	0.9968	1.505e-05
243	TCONS_00140808	ENSSSCG00000011627	0.9968	1.523e-05
244	ENSSSCT00000072303	ENSSSCG00000016635	0.9968	1.527e-05
245	ENSSSCT00000090939	ENSSSCG00000028217	-0.9968	1.557e-05
246	TCONS_00109243	ENSSSCG00000038766	0.9968	1.57e-05
247	TCONS_00154929	ENSSSCG00000022525	0.9968	1.572e-05
248	TCONS_00058865	ENSSSCG00000004191	0.9968	1.572e-05
249	TCONS_00282681	ENSSSCG00000003732	0.9968	1.579e-05
250	ENSSSCT00000086722	ENSSSCG00000011751	0.9967	1.63e-05
251	TCONS_00163277	ENSSSCG00000036046	0.9967	1.632e-05
252	TCONS_00140798	ENSSSCG00000046241	0.9967	1.655e-05
253	TCONS_00261208	ENSSSCG00000035789	0.9967	1.657e-05
254	TCONS_00136311	ENSSSCG00000016384	0.9967	1.659e-05
255	TCONS_00304212	ENSSSCG00000035621	0.9967	1.667e-05
256	TCONS_00304212	ENSSSCG00000044445	0.9967	1.668e-05
257	TCONS_00252186	ENSSSCG00000040599	0.9967	1.679e-05
258	ENSSSCT00000084875	ENSSSCG00000030371	0.9966	1.694e-05
259	TCONS_00058603	ENSSSCG00000017624	0.9966	1.707e-05
260	TCONS_00122607	ENSSSCG00000021176	0.9966	1.708e-05
261	ENSSSCT00000076488	ENSSSCG00000028942	0.9966	1.711e-05
262	TCONS_00122607	ENSSSCG00000037032	0.9966	1.712e-05
263	TCONS_00302231	ENSSSCG00000011751	0.9966	1.727e-05
264	ENSSSCT00000072499	ENSSSCG00000036751	0.9966	1.761e-05
265	TCONS_00302231	ENSSSCG00000045986	0.9966	1.771e-05
266	ENSSSCT00000078282	ENSSSCG00000044201	0.9966	1.771e-05
267	ENSSSCT00000087419	ENSSSCG00000003732	0.9966	1.772e-05
268	TCONS_00079146	ENSSSCG00000026478	0.9965	1.794e-05
269	TCONS_00148627	ENSSSCG00000000292	0.9965	1.818e-05
270	TCONS_00175321	ENSSSCG00000031944	0.9965	1.824e-05
271	ENSSSCT00000089505	ENSSSCG00000011751	0.9965	1.83e-05
272	TCONS_00175643	ENSSSCG00000015489	0.9965	1.831e-05
273	TCONS_00062238	ENSSSCG00000026478	0.9965	1.846e-05
274	TCONS_00138546	ENSSSCG00000045652	0.9965	1.848e-05
275	TCONS_00163277	ENSSSCG00000030371	0.9965	1.865e-05
276	TCONS_00230769	ENSSSCG00000009270	0.9965	1.871e-05
277	TCONS_00140808	ENSSSCG00000015741	0.9965	1.886e-05
278	TCONS_00264872	ENSSSCG00000023296	0.9964	1.89e-05
279	TCONS_00019692	ENSSSCG00000001049	0.9964	1.915e-05
280	ENSSSCT00000088344	ENSSSCG00000032810	0.9964	1.924e-05
281	TCONS_00303966	ENSSSCG00000016384	0.9964	1.926e-05
282	ENSSSCT00000088091	ENSSSCG00000028896	0.9964	1.935e-05
283	TCONS_00121827	ENSSSCG00000004225	-0.9964	1.941e-05
284	ENSSSCT00000089867	ENSSSCG00000002632	0.9964	1.951e-05
285	TCONS_00167919	ENSSSCG00000048668	0.9963	2.003e-05
286	ENSSSCT00000085840	ENSSSCG00000011751	0.9963	2.009e-05
287	ENSSSCT00000084718	ENSSSCG00000001444	0.9963	2.021e-05
288	TCONS_00019692	ENSSSCG00000010994	0.9963	2.033e-05
289	TCONS_00234841	ENSSSCG00000026478	0.9963	2.039e-05
290	ENSSSCT00000081197	ENSSSCG00000033229	0.9963	2.043e-05
291	ENSSSCT00000081414	ENSSSCG00000016635	0.9963	2.066e-05
292	ENSSSCT00000085840	ENSSSCG00000022525	0.9963	2.067e-05
293	TCONS_00318985	ENSSSCG00000009941	0.9963	2.078e-05
294	ENSSSCT00000074880	ENSSSCG00000010536	0.9963	2.085e-05
295	ENSSSCT00000074832	ENSSSCG00000023393	0.9963	2.104e-05
296	TCONS_00318670	ENSSSCG00000044445	0.9962	2.118e-05
297	TCONS_00204260	ENSSSCG00000015030	0.9962	2.129e-05
298	TCONS_00300468	ENSSSCG00000035789	0.9962	2.134e-05
299	TCONS_00019692	ENSSSCG00000041625	0.9962	2.142e-05
300	TCONS_00140808	ENSSSCG00000009941	0.9962	2.147e-05
301	TCONS_00214071	ENSSSCG00000002478	0.9962	2.168e-05
302	TCONS_00196211	ENSSSCG00000046748	0.9962	2.175e-05
303	TCONS_00208233	ENSSSCG00000027928	0.9962	2.197e-05
304	TCONS_00180617	ENSSSCG00000002857	0.9962	2.202e-05
305	TCONS_00144414	ENSSSCG00000028942	0.9962	2.207e-05
306	TCONS_00151368	ENSSSCG00000009216	0.9962	2.22e-05
307	ENSSSCT00000077323	ENSSSCG00000016635	0.9961	2.237e-05
308	TCONS_00304616	ENSSSCG00000030371	0.9961	2.244e-05
309	TCONS_00208233	ENSSSCG00000035854	0.9961	2.246e-05
310	TCONS_00019692	ENSSSCG00000027928	0.9961	2.31e-05
311	ENSSSCT00000066614	ENSSSCG00000028942	0.996	2.351e-05
312	TCONS_00230769	ENSSSCG00000017498	0.996	2.353e-05
313	TCONS_00175044	ENSSSCG00000000854	0.996	2.354e-05
314	TCONS_00145442	ENSSSCG00000016156	0.996	2.356e-05
315	ENSSSCT00000067348	ENSSSCG00000017498	0.996	2.363e-05
316	TCONS_00261208	ENSSSCG00000015795	0.996	2.368e-05
317	TCONS_00028382	ENSSSCG00000012324	-0.996	2.425e-05
318	TCONS_00138546	ENSSSCG00000035863	0.996	2.435e-05
319	TCONS_00138523	ENSSSCG00000016671	0.996	2.456e-05
320	TCONS_00227721	ENSSSCG00000040521	0.9959	2.458e-05
321	TCONS_00058865	ENSSSCG00000033946	0.9959	2.461e-05
322	TCONS_00305190	ENSSSCG00000003797	0.9959	2.47e-05
323	TCONS_00303966	ENSSSCG00000032902	0.9959	2.484e-05
324	TCONS_00140801	ENSSSCG00000007476	0.9959	2.489e-05
325	TCONS_00089981	ENSSSCG00000036751	0.9959	2.51e-05
326	TCONS_00163277	ENSSSCG00000051740	0.9959	2.523e-05
327	TCONS_00054349	ENSSSCG00000001840	0.9959	2.539e-05
328	TCONS_00008058	ENSSSCG00000026985	0.9959	2.567e-05
329	TCONS_00047779	ENSSSCG00000050530	0.9959	2.569e-05
330	TCONS_00318672	ENSSSCG00000045986	0.9958	2.609e-05
331	TCONS_00033154	ENSSSCG00000021585	0.9958	2.616e-05
332	TCONS_00233798	ENSSSCG00000012963	0.9958	2.626e-05
333	TCONS_00290219	ENSSSCG00000029938	0.9958	2.641e-05
334	TCONS_00065981	ENSSSCG00000038824	0.9958	2.648e-05
335	TCONS_00154929	ENSSSCG00000016671	0.9958	2.656e-05
336	ENSSSCT00000077351	ENSSSCG00000010536	0.9958	2.665e-05
337	TCONS_00234841	ENSSSCG00000037032	0.9957	2.725e-05
338	TCONS_00062238	ENSSSCG00000037032	0.9957	2.739e-05
339	ENSSSCT00000077447	ENSSSCG00000040403	0.9957	2.749e-05
340	TCONS_00065939	ENSSSCG00000001049	0.9957	2.777e-05
341	ENSSSCT00000083210	ENSSSCG00000021176	0.9957	2.78e-05
342	ENSSSCT00000086722	ENSSSCG00000046748	0.9957	2.787e-05
343	TCONS_00138523	ENSSSCG00000009941	0.9957	2.822e-05
344	TCONS_00208232	ENSSSCG00000033946	0.9956	2.852e-05
345	TCONS_00094048	ENSSSCG00000035621	0.9956	2.857e-05
346	TCONS_00126361	ENSSSCG00000001518	0.9956	2.864e-05
347	ENSSSCT00000081099	ENSSSCG00000035854	0.9956	2.895e-05
348	ENSSSCT00000083231	ENSSSCG00000033229	0.9956	2.907e-05
349	TCONS_00132019	ENSSSCG00000029331	0.9956	2.918e-05
350	TCONS_00120002	ENSSSCG00000033229	0.9956	2.934e-05
351	TCONS_00167919	ENSSSCG00000032054	0.9955	2.969e-05
352	TCONS_00132536	ENSSSCG00000011751	0.9955	2.974e-05
353	TCONS_00300838	ENSSSCG00000016156	0.9955	2.985e-05
354	ENSSSCT00000085552	ENSSSCG00000044445	0.9955	3.012e-05
355	ENSSSCT00000076421	ENSSSCG00000005193	0.9955	3.019e-05
356	TCONS_00102143	ENSSSCG00000011942	0.9955	3.034e-05
357	TCONS_00300468	ENSSSCG00000044903	0.9955	3.05e-05
358	TCONS_00174435	ENSSSCG00000027275	0.9955	3.063e-05
359	TCONS_00079146	ENSSSCG00000037032	0.9955	3.097e-05
360	TCONS_00234525	ENSSSCG00000027609	0.9954	3.106e-05
361	TCONS_00222052	ENSSSCG00000017249	0.9954	3.117e-05
362	TCONS_00196211	ENSSSCG00000045986	0.9954	3.128e-05
363	ENSSSCT00000078282	ENSSSCG00000010617	0.9954	3.15e-05
364	ENSSSCT00000069026	ENSSSCG00000029902	0.9954	3.166e-05
365	TCONS_00252347	ENSSSCG00000011078	0.9954	3.185e-05
366	TCONS_00094048	ENSSSCG00000046241	0.9954	3.186e-05
367	TCONS_00102143	ENSSSCG00000021880	0.9954	3.192e-05
368	TCONS_00102241	ENSSSCG00000005164	0.9954	3.204e-05
369	TCONS_00282098	ENSSSCG00000028896	0.9954	3.208e-05
370	TCONS_00140803	ENSSSCG00000030371	0.9953	3.271e-05
371	TCONS_00306728	ENSSSCG00000002307	-0.9953	3.278e-05
372	TCONS_00252186	ENSSSCG00000039245	0.9953	3.287e-05
373	TCONS_00250121	ENSSSCG00000030209	0.9953	3.29e-05
374	TCONS_00207873	ENSSSCG00000037451	0.9953	3.291e-05
375	ENSSSCT00000072882	ENSSSCG00000021813	0.9953	3.293e-05
376	TCONS_00173538	ENSSSCG00000043223	0.9953	3.305e-05
377	TCONS_00230769	ENSSSCG00000033299	0.9953	3.32e-05
378	TCONS_00290219	ENSSSCG00000029419	0.9953	3.327e-05
379	ENSSSCT00000072852	ENSSSCG00000017411	0.9953	3.349e-05
380	TCONS_00138523	ENSSSCG00000015741	0.9953	3.35e-05
381	TCONS_00182796	ENSSSCG00000017498	0.9953	3.354e-05
382	TCONS_00142251	ENSSSCG00000016384	0.9952	3.407e-05
383	TCONS_00065197	ENSSSCG00000012324	-0.9952	3.413e-05
384	TCONS_00173059	ENSSSCG00000035967	-0.9952	3.428e-05
385	TCONS_00259004	ENSSSCG00000025794	-0.9952	3.431e-05
386	TCONS_00296586	ENSSSCG00000037497	0.9952	3.439e-05
387	TCONS_00174501	ENSSSCG00000046748	0.9952	3.444e-05
388	TCONS_00261206	ENSSSCG00000008140	0.9952	3.452e-05
389	TCONS_00065197	ENSSSCG00000035863	0.9952	3.476e-05
390	TCONS_00302232	ENSSSCG00000051740	0.9952	3.478e-05
391	TCONS_00302232	ENSSSCG00000015795	0.9952	3.5e-05
392	ENSSSCT00000086722	ENSSSCG00000022525	0.9952	3.512e-05
393	TCONS_00101632	ENSSSCG00000036751	0.9951	3.523e-05
394	ENSSSCT00000067348	ENSSSCG00000035854	0.9951	3.541e-05
395	TCONS_00302231	ENSSSCG00000007836	0.9951	3.563e-05
396	TCONS_00138523	ENSSSCG00000011627	0.9951	3.579e-05
397	ENSSSCT00000076488	ENSSSCG00000028896	0.9951	3.595e-05
398	TCONS_00173059	ENSSSCG00000032129	0.9951	3.6e-05
399	TCONS_00174435	ENSSSCG00000005613	0.9951	3.606e-05
400	ENSSSCT00000079861	ENSSSCG00000036751	0.9951	3.614e-05
401	TCONS_00091354	ENSSSCG00000000732	-0.9951	3.639e-05
402	TCONS_00102241	ENSSSCG00000025644	0.995	3.675e-05
403	ENSSSCT00000080396	ENSSSCG00000010517	0.995	3.681e-05
404	TCONS_00254780	ENSSSCG00000031307	0.995	3.686e-05
405	TCONS_00101632	ENSSSCG00000001518	0.995	3.687e-05
406	TCONS_00140808	ENSSSCG00000026061	0.995	3.714e-05
407	TCONS_00166127	ENSSSCG00000011034	0.995	3.728e-05
408	TCONS_00282848	ENSSSCG00000007842	0.995	3.789e-05
409	TCONS_00264872	ENSSSCG00000016581	0.995	3.793e-05
410	ENSSSCT00000086722	ENSSSCG00000007836	0.9949	3.823e-05
411	TCONS_00047779	ENSSSCG00000027928	0.9949	3.836e-05
412	TCONS_00054349	ENSSSCG00000023204	0.9949	3.841e-05
413	TCONS_00158142	ENSSSCG00000046748	0.9949	3.901e-05
414	TCONS_00063482	ENSSSCG00000032129	0.9949	3.946e-05
415	TCONS_00282098	ENSSSCG00000012272	0.9949	3.964e-05
416	ENSSSCT00000083231	ENSSSCG00000011751	0.9948	3.974e-05
417	TCONS_00017865	ENSSSCG00000017498	0.9948	3.976e-05
418	TCONS_00234841	ENSSSCG00000031944	0.9948	3.994e-05
419	ENSSSCT00000081197	ENSSSCG00000029311	0.9948	4.003e-05
420	ENSSSCT00000076488	ENSSSCG00000051740	0.9948	4.007e-05
421	ENSSSCT00000087681	ENSSSCG00000039188	0.9948	4.008e-05
422	TCONS_00302231	ENSSSCG00000015741	0.9948	4.053e-05
423	ENSSSCT00000076984	ENSSSCG00000008927	0.9948	4.059e-05
424	TCONS_00302231	ENSSSCG00000011627	0.9948	4.07e-05
425	TCONS_00138523	ENSSSCG00000029311	0.9948	4.081e-05
426	TCONS_00304212	ENSSSCG00000040770	0.9948	4.088e-05
427	TCONS_00138523	ENSSSCG00000014318	0.9948	4.119e-05
428	TCONS_00163277	ENSSSCG00000028942	0.9947	4.158e-05
429	TCONS_00102143	ENSSSCG00000029392	0.9947	4.175e-05
430	ENSSSCT00000085840	ENSSSCG00000044903	0.9947	4.182e-05
431	ENSSSCT00000083260	ENSSSCG00000045986	0.9947	4.207e-05
432	TCONS_00065939	ENSSSCG00000017498	0.9947	4.226e-05
433	ENSSSCT00000081116	ENSSSCG00000040843	0.9947	4.231e-05
434	TCONS_00078996	ENSSSCG00000015489	0.9947	4.236e-05
435	TCONS_00140808	ENSSSCG00000015917	0.9947	4.239e-05
436	ENSSSCT00000076488	ENSSSCG00000009498	0.9947	4.272e-05
437	TCONS_00174501	ENSSSCG00000044903	0.9947	4.274e-05
438	TCONS_00015186	ENSSSCG00000016581	0.9947	4.278e-05
439	TCONS_00318672	ENSSSCG00000046748	0.9947	4.284e-05
440	TCONS_00035263	ENSSSCG00000039188	0.9946	4.298e-05
441	ENSSSCT00000077351	ENSSSCG00000005928	0.9946	4.313e-05
442	TCONS_00127982	ENSSSCG00000001808	0.9946	4.32e-05
443	TCONS_00302231	ENSSSCG00000014318	0.9946	4.352e-05
444	TCONS_00138546	ENSSSCG00000012324	-0.9946	4.361e-05
445	TCONS_00173537	ENSSSCG00000045986	0.9946	4.37e-05
446	TCONS_00064570	ENSSSCG00000049186	0.9946	4.374e-05
447	TCONS_00126234	ENSSSCG00000048477	0.9946	4.384e-05
448	ENSSSCT00000069893	ENSSSCG00000028942	0.9946	4.387e-05
449	TCONS_00167919	ENSSSCG00000040130	0.9946	4.39e-05
450	TCONS_00302231	ENSSSCG00000022525	0.9946	4.395e-05
451	TCONS_00252347	ENSSSCG00000005193	0.9946	4.405e-05
452	TCONS_00300838	ENSSSCG00000000528	0.9946	4.427e-05
453	TCONS_00167919	ENSSSCG00000022261	0.9946	4.436e-05
454	TCONS_00144414	ENSSSCG00000036046	0.9945	4.523e-05
455	TCONS_00152822	ENSSSCG00000020859	0.9945	4.523e-05
456	TCONS_00284360	ENSSSCG00000037451	0.9945	4.533e-05
457	TCONS_00300495	ENSSSCG00000043223	0.9945	4.539e-05
458	TCONS_00140815	ENSSSCG00000010494	0.9945	4.55e-05
459	ENSSSCT00000074832	ENSSSCG00000009498	0.9945	4.575e-05
460	TCONS_00318985	ENSSSCG00000029311	0.9945	4.583e-05
461	TCONS_00136311	ENSSSCG00000032902	0.9945	4.585e-05
462	TCONS_00152805	ENSSSCG00000015489	0.9945	4.606e-05
463	TCONS_00000237	ENSSSCG00000004191	0.9945	4.607e-05
464	TCONS_00256285	ENSSSCG00000001520	-0.9944	4.618e-05
465	TCONS_00233798	ENSSSCG00000014221	0.9944	4.618e-05
466	ENSSSCT00000082885	ENSSSCG00000012440	0.9944	4.63e-05
467	ENSSSCT00000087681	ENSSSCG00000016288	0.9944	4.667e-05
468	ENSSSCT00000075678	ENSSSCG00000025108	0.9944	4.667e-05
469	TCONS_00214071	ENSSSCG00000006979	0.9944	4.668e-05
470	TCONS_00140801	ENSSSCG00000034919	0.9944	4.683e-05
471	TCONS_00296586	ENSSSCG00000035621	0.9944	4.686e-05
472	ENSSSCT00000079861	ENSSSCG00000004672	0.9944	4.701e-05
473	TCONS_00140803	ENSSSCG00000036046	0.9944	4.704e-05
474	TCONS_00102143	ENSSSCG00000029778	0.9944	4.705e-05
475	TCONS_00089981	ENSSSCG00000027286	0.9944	4.739e-05
476	TCONS_00062238	ENSSSCG00000031944	0.9944	4.74e-05
477	TCONS_00222052	ENSSSCG00000010232	0.9944	4.766e-05
478	TCONS_00142251	ENSSSCG00000048009	0.9943	4.824e-05
479	TCONS_00250121	ENSSSCG00000031518	0.9943	4.828e-05
480	ENSSSCT00000081197	ENSSSCG00000046748	0.9943	4.847e-05
481	TCONS_00233798	ENSSSCG00000040507	0.9943	4.886e-05
482	ENSSSCT00000083231	ENSSSCG00000029311	0.9943	4.895e-05
483	ENSSSCT00000081414	ENSSSCG00000016256	0.9943	4.909e-05
484	TCONS_00240274	ENSSSCG00000009498	0.9943	4.911e-05
485	TCONS_00120002	ENSSSCG00000044903	0.9943	4.942e-05
486	TCONS_00254780	ENSSSCG00000012676	0.9942	4.978e-05
487	TCONS_00246231	ENSSSCG00000017411	0.9942	5.024e-05
488	ENSSSCT00000072245	ENSSSCG00000040714	0.9942	5.026e-05
489	TCONS_00132536	ENSSSCG00000033229	0.9942	5.03e-05
490	TCONS_00208232	ENSSSCG00000000292	0.9942	5.062e-05
491	TCONS_00214071	ENSSSCG00000025644	0.9942	5.077e-05
492	ENSSSCT00000082834	ENSSSCG00000035789	0.9942	5.078e-05
493	TCONS_00008058	ENSSSCG00000032054	0.9942	5.112e-05
494	TCONS_00281166	ENSSSCG00000011078	0.9941	5.151e-05
495	TCONS_00222052	ENSSSCG00000026260	0.9941	5.153e-05
496	ENSSSCT00000080396	ENSSSCG00000037032	0.9941	5.176e-05
497	ENSSSCT00000088091	ENSSSCG00000015903	0.9941	5.185e-05
498	TCONS_00318412	ENSSSCG00000033229	0.9941	5.212e-05
499	ENSSSCT00000087419	ENSSSCG00000012440	0.9941	5.223e-05
500	TCONS_00140815	ENSSSCG00000011078	0.9941	5.243e-05
501	TCONS_00300838	ENSSSCG00000033199	0.9941	5.253e-05
502	TCONS_00282800	ENSSSCG00000001463	0.9941	5.264e-05
503	ENSSSCT00000088091	ENSSSCG00000009378	0.9941	5.284e-05
504	ENSSSCT00000076421	ENSSSCG00000048009	0.994	5.3e-05
505	TCONS_00140808	ENSSSCG00000045986	0.994	5.314e-05
506	TCONS_00138523	ENSSSCG00000045986	0.994	5.314e-05
507	ENSSSCT00000069893	ENSSSCG00000048009	0.994	5.319e-05
508	TCONS_00300495	ENSSSCG00000021585	0.994	5.319e-05
509	TCONS_00227721	ENSSSCG00000001049	0.994	5.354e-05
510	ENSSSCT00000084875	ENSSSCG00000015903	0.994	5.477e-05
511	TCONS_00054908	ENSSSCG00000042867	0.9939	5.483e-05
512	TCONS_00208233	ENSSSCG00000001049	0.9939	5.495e-05
513	TCONS_00276112	ENSSSCG00000006379	0.9939	5.541e-05
514	TCONS_00154929	ENSSSCG00000044903	0.9939	5.587e-05
515	TCONS_00015186	ENSSSCG00000023296	0.9939	5.599e-05
516	TCONS_00234525	ENSSSCG00000029902	0.9939	5.605e-05
517	ENSSSCT00000082834	ENSSSCG00000040770	0.9939	5.611e-05
518	TCONS_00062238	ENSSSCG00000010517	0.9939	5.638e-05
519	TCONS_00175261	ENSSSCG00000040681	-0.9938	5.69e-05
520	ENSSSCT00000067348	ENSSSCG00000000292	0.9938	5.698e-05
521	ENSSSCT00000086722	ENSSSCG00000040714	0.9938	5.701e-05
522	ENSSSCT00000080396	ENSSSCG00000012440	0.9938	5.702e-05
523	TCONS_00154929	ENSSSCG00000009941	0.9938	5.709e-05
524	TCONS_00065939	ENSSSCG00000015862	0.9938	5.713e-05
525	TCONS_00163277	ENSSSCG00000028896	0.9938	5.72e-05
526	TCONS_00302231	ENSSSCG00000003748	0.9938	5.731e-05
527	TCONS_00079146	ENSSSCG00000031944	0.9938	5.783e-05
528	TCONS_00148627	ENSSSCG00000020678	0.9938	5.803e-05
529	TCONS_00111522	ENSSSCG00000030371	0.9938	5.841e-05
530	TCONS_00140808	ENSSSCG00000011751	0.9938	5.845e-05
531	TCONS_00079146	ENSSSCG00000010517	0.9937	5.855e-05
532	TCONS_00296593	ENSSSCG00000004662	0.9937	5.894e-05
533	ENSSSCT00000085840	ENSSSCG00000051740	0.9937	5.897e-05
534	TCONS_00276112	ENSSSCG00000008769	0.9937	5.898e-05
535	TCONS_00182796	ENSSSCG00000035854	0.9937	5.908e-05
536	TCONS_00102241	ENSSSCG00000021176	0.9937	5.911e-05
537	ENSSSCT00000074832	ENSSSCG00000051740	0.9937	5.913e-05
538	TCONS_00140798	ENSSSCG00000035621	0.9937	5.933e-05
539	ENSSSCT00000069026	ENSSSCG00000007436	0.9937	5.938e-05
540	ENSSSCT00000089505	ENSSSCG00000051740	0.9937	5.941e-05
541	TCONS_00152822	ENSSSCG00000016581	0.9937	5.942e-05
542	TCONS_00300838	ENSSSCG00000004819	0.9937	5.959e-05
543	TCONS_00246231	ENSSSCG00000026260	0.9937	5.971e-05
544	TCONS_00281166	ENSSSCG00000028942	0.9937	5.975e-05
545	ENSSSCT00000087681	ENSSSCG00000028723	0.9936	6.047e-05
546	TCONS_00079146	ENSSSCG00000021176	0.9936	6.047e-05
547	TCONS_00111522	ENSSSCG00000005193	0.9936	6.059e-05
548	TCONS_00091354	ENSSSCG00000003998	-0.9936	6.065e-05
549	TCONS_00138523	ENSSSCG00000003748	0.9936	6.072e-05
550	ENSSSCT00000081099	ENSSSCG00000001657	0.9936	6.082e-05
551	TCONS_00303088	ENSSSCG00000037676	0.9936	6.117e-05
552	TCONS_00158142	ENSSSCG00000033229	0.9936	6.161e-05
553	TCONS_00290219	ENSSSCG00000031581	0.9936	6.165e-05
554	ENSSSCT00000090542	ENSSSCG00000045652	0.9936	6.176e-05
555	TCONS_00302232	ENSSSCG00000044903	0.9936	6.188e-05
556	ENSSSCT00000075678	ENSSSCG00000032081	0.9936	6.225e-05
557	TCONS_00297873	ENSSSCG00000006771	-0.9935	6.229e-05
558	TCONS_00144414	ENSSSCG00000030371	0.9935	6.234e-05
559	TCONS_00099710	ENSSSCG00000009941	0.9935	6.243e-05
560	TCONS_00302231	ENSSSCG00000015917	0.9935	6.288e-05
561	TCONS_00224182	ENSSSCG00000002307	-0.9935	6.291e-05
562	TCONS_00300838	ENSSSCG00000011764	0.9935	6.303e-05
563	TCONS_00065939	ENSSSCG00000017406	0.9935	6.317e-05
564	TCONS_00142409	ENSSSCG00000023393	0.9935	6.328e-05
565	TCONS_00142251	ENSSSCG00000032902	0.9935	6.349e-05
566	ENSSSCT00000082834	ENSSSCG00000044903	0.9935	6.349e-05
567	TCONS_00196211	ENSSSCG00000009941	0.9935	6.354e-05
568	TCONS_00224182	ENSSSCG00000008624	0.9935	6.357e-05
569	TCONS_00152822	ENSSSCG00000016110	0.9935	6.364e-05
570	TCONS_00174435	ENSSSCG00000016412	0.9935	6.376e-05
571	TCONS_00318672	ENSSSCG00000009941	0.9935	6.421e-05
572	TCONS_00008058	ENSSSCG00000034086	0.9934	6.462e-05
573	TCONS_00234841	ENSSSCG00000010517	0.9934	6.528e-05
574	TCONS_00154929	ENSSSCG00000045986	0.9934	6.537e-05
575	ENSSSCT00000083260	ENSSSCG00000009941	0.9934	6.557e-05
576	ENSSSCT00000090542	ENSSSCG00000035863	0.9934	6.591e-05
577	TCONS_00224182	ENSSSCG00000016107	-0.9934	6.603e-05
578	ENSSSCT00000088091	ENSSSCG00000028942	0.9934	6.606e-05
579	ENSSSCT00000088344	ENSSSCG00000039188	0.9933	6.619e-05
580	TCONS_00032432	ENSSSCG00000025751	0.9933	6.658e-05
581	TCONS_00232121	ENSSSCG00000008392	0.9933	6.67e-05
582	TCONS_00154929	ENSSSCG00000026061	0.9933	6.679e-05
583	ENSSSCT00000082834	ENSSSCG00000026061	0.9933	6.689e-05
584	ENSSSCT00000087681	ENSSSCG00000032810	0.9933	6.723e-05
585	TCONS_00150907	ENSSSCG00000038766	0.9933	6.724e-05
586	TCONS_00284360	ENSSSCG00000014038	0.9933	6.731e-05
587	TCONS_00091354	ENSSSCG00000016217	-0.9933	6.743e-05
588	TCONS_00017865	ENSSSCG00000035854	0.9933	6.795e-05
589	TCONS_00140803	ENSSSCG00000051740	0.9932	6.823e-05
590	TCONS_00284360	ENSSSCG00000012857	0.9932	6.833e-05
591	TCONS_00008769	ENSSSCG00000001536	0.9932	6.84e-05
592	TCONS_00300482	ENSSSCG00000005193	0.9932	6.842e-05
593	TCONS_00219951	ENSSSCG00000031557	0.9932	6.873e-05
594	ENSSSCT00000083231	ENSSSCG00000016671	0.9932	6.88e-05
595	TCONS_00152274	ENSSSCG00000028479	0.9932	6.888e-05
596	ENSSSCT00000078460	ENSSSCG00000013736	0.9932	6.9e-05
597	TCONS_00058865	ENSSSCG00000015864	0.9932	6.908e-05
598	TCONS_00109243	ENSSSCG00000017624	0.9932	6.949e-05
599	TCONS_00065939	ENSSSCG00000035854	0.9932	6.968e-05
600	ENSSSCT00000076984	ENSSSCG00000016256	0.9932	6.969e-05
601	TCONS_00233798	ENSSSCG00000014598	0.9932	6.983e-05
602	ENSSSCT00000090542	ENSSSCG00000038350	0.9932	6.997e-05
603	TCONS_00019692	ENSSSCG00000017406	0.9932	7.006e-05
604	ENSSSCT00000088568	ENSSSCG00000006141	0.9932	7.012e-05
605	TCONS_00111522	ENSSSCG00000036046	0.9931	7.024e-05
606	TCONS_00138523	ENSSSCG00000033229	0.9931	7.032e-05
607	TCONS_00240274	ENSSSCG00000043963	0.9931	7.075e-05
608	TCONS_00296586	ENSSSCG00000046241	0.9931	7.076e-05
609	TCONS_00282800	ENSSSCG00000005613	0.9931	7.081e-05
610	TCONS_00282800	ENSSSCG00000029778	0.9931	7.081e-05
611	TCONS_00300481	ENSSSCG00000023296	0.9931	7.083e-05
612	TCONS_00089981	ENSSSCG00000001657	0.9931	7.138e-05
613	TCONS_00261206	ENSSSCG00000040608	0.9931	7.15e-05
614	TCONS_00252347	ENSSSCG00000048009	0.9931	7.173e-05
615	TCONS_00063482	ENSSSCG00000012440	0.9931	7.174e-05
616	TCONS_00230769	ENSSSCG00000040037	0.9931	7.184e-05
617	TCONS_00132536	ENSSSCG00000029311	0.9931	7.185e-05
618	TCONS_00224182	ENSSSCG00000035221	0.9931	7.191e-05
619	TCONS_00065981	ENSSSCG00000017671	-0.9931	7.215e-05
620	ENSSSCT00000087419	ENSSSCG00000032129	0.9931	7.221e-05
621	TCONS_00284360	ENSSSCG00000000220	0.9931	7.227e-05
622	TCONS_00261206	ENSSSCG00000040795	0.993	7.24e-05
623	TCONS_00008058	ENSSSCG00000048668	0.993	7.317e-05
624	TCONS_00252520	ENSSSCG00000015395	0.993	7.333e-05
625	TCONS_00276112	ENSSSCG00000015353	0.993	7.343e-05
626	TCONS_00054908	ENSSSCG00000012324	-0.993	7.344e-05
627	TCONS_00240274	ENSSSCG00000030371	0.993	7.346e-05
628	TCONS_00173537	ENSSSCG00000009941	0.993	7.347e-05
629	TCONS_00296587	ENSSSCG00000000854	0.993	7.351e-05
630	ENSSSCT00000072499	ENSSSCG00000027286	0.993	7.42e-05
631	TCONS_00054908	ENSSSCG00000035863	0.9929	7.447e-05
632	ENSSSCT00000088091	ENSSSCG00000036046	0.9929	7.466e-05
633	TCONS_00182796	ENSSSCG00000015015	0.9929	7.47e-05
634	TCONS_00142409	ENSSSCG00000051740	0.9929	7.499e-05
635	TCONS_00302232	ENSSSCG00000011751	0.9929	7.516e-05
636	ENSSSCT00000085840	ENSSSCG00000046748	0.9929	7.545e-05
637	TCONS_00302232	ENSSSCG00000022525	0.9929	7.591e-05
638	TCONS_00120002	ENSSSCG00000029311	0.9929	7.593e-05
639	ENSSSCT00000086043	ENSSSCG00000044445	0.9929	7.605e-05
640	ENSSSCT00000068579	ENSSSCG00000010903	0.9929	7.618e-05
641	TCONS_00302232	ENSSSCG00000030371	0.9929	7.629e-05
642	ENSSSCT00000084875	ENSSSCG00000023393	0.9929	7.643e-05
643	TCONS_00019692	ENSSSCG00000015862	0.9928	7.687e-05
644	TCONS_00062238	ENSSSCG00000021176	0.9928	7.689e-05
645	TCONS_00174501	ENSSSCG00000033229	0.9928	7.707e-05
646	TCONS_00304212	ENSSSCG00000032902	0.9928	7.752e-05
647	TCONS_00222052	ENSSSCG00000037987	0.9928	7.771e-05
648	TCONS_00054408	ENSSSCG00000040770	0.9928	7.839e-05
649	ENSSSCT00000086722	ENSSSCG00000035789	0.9928	7.852e-05
650	TCONS_00282098	ENSSSCG00000009378	0.9928	7.857e-05
651	TCONS_00111522	ENSSSCG00000040714	0.9927	7.884e-05
652	TCONS_00163277	ENSSSCG00000009498	0.9927	7.961e-05
653	ENSSSCT00000088568	ENSSSCG00000036785	0.9927	7.964e-05
654	ENSSSCT00000083260	ENSSSCG00000016671	0.9927	7.974e-05
655	ENSSSCT00000072499	ENSSSCG00000001518	0.9927	7.984e-05
656	ENSSSCT00000082834	ENSSSCG00000004075	0.9927	7.995e-05
657	ENSSSCT00000069026	ENSSSCG00000015353	0.9927	8.004e-05
658	TCONS_00318412	ENSSSCG00000046748	0.9927	8.012e-05
659	TCONS_00149488	ENSSSCG00000001840	0.9927	8.059e-05
660	TCONS_00058603	ENSSSCG00000038766	0.9926	8.11e-05
661	TCONS_00132536	ENSSSCG00000045986	0.9926	8.129e-05
662	TCONS_00120002	ENSSSCG00000007836	0.9926	8.132e-05
663	TCONS_00043392	ENSSSCG00000010682	-0.9926	8.137e-05
664	TCONS_00043392	ENSSSCG00000010447	0.9926	8.141e-05
665	TCONS_00199506	ENSSSCG00000028217	0.9926	8.146e-05
666	TCONS_00186356	ENSSSCG00000030908	0.9926	8.16e-05
667	TCONS_00142409	ENSSSCG00000015903	0.9926	8.173e-05
668	TCONS_00182795	ENSSSCG00000028431	-0.9926	8.186e-05
669	TCONS_00138523	ENSSSCG00000015917	0.9926	8.194e-05
670	ENSSSCT00000079861	ENSSSCG00000016892	0.9926	8.194e-05
671	TCONS_00109243	ENSSSCG00000021828	-0.9926	8.195e-05
672	ENSSSCT00000074880	ENSSSCG00000044201	0.9926	8.207e-05
673	TCONS_00140803	ENSSSCG00000040714	0.9926	8.228e-05
674	TCONS_00033154	ENSSSCG00000026594	0.9926	8.233e-05
675	TCONS_00318985	ENSSSCG00000045986	0.9926	8.284e-05
676	TCONS_00227721	ENSSSCG00000010446	0.9926	8.302e-05
677	TCONS_00197785	ENSSSCG00000008140	0.9925	8.321e-05
678	TCONS_00230769	ENSSSCG00000008241	0.9925	8.332e-05
679	ENSSSCT00000087419	ENSSSCG00000031944	0.9925	8.357e-05
680	TCONS_00140803	ENSSSCG00000009498	0.9925	8.425e-05
681	TCONS_00065939	ENSSSCG00000008241	0.9925	8.439e-05
682	ENSSSCT00000069893	ENSSSCG00000011078	0.9925	8.457e-05
683	TCONS_00272792	ENSSSCG00000004643	0.9924	8.548e-05
684	ENSSSCT00000082885	ENSSSCG00000031944	0.9924	8.563e-05
685	TCONS_00276112	ENSSSCG00000006979	0.9924	8.57e-05
686	TCONS_00054349	ENSSSCG00000009676	0.9924	8.581e-05
687	ENSSSCT00000075678	ENSSSCG00000017907	0.9924	8.591e-05
688	ENSSSCT00000074880	ENSSSCG00000036785	0.9924	8.601e-05
689	ENSSSCT00000072245	ENSSSCG00000004075	0.9924	8.632e-05
690	TCONS_00126361	ENSSSCG00000001657	0.9924	8.637e-05
691	TCONS_00207873	ENSSSCG00000038824	0.9924	8.695e-05
692	TCONS_00230769	ENSSSCG00000010446	0.9924	8.71e-05
693	TCONS_00043392	ENSSSCG00000017624	0.9924	8.737e-05
694	ENSSSCT00000082885	ENSSSCG00000032129	0.9924	8.75e-05
695	TCONS_00302232	ENSSSCG00000009498	0.9923	8.757e-05
696	TCONS_00052227	ENSSSCG00000004643	0.9923	8.767e-05
697	TCONS_00291514	ENSSSCG00000037451	0.9923	8.783e-05
698	ENSSSCT00000072245	ENSSSCG00000044445	0.9923	8.795e-05
699	TCONS_00017865	ENSSSCG00000033946	0.9923	8.806e-05
700	TCONS_00175321	ENSSSCG00000012440	0.9923	8.81e-05
701	TCONS_00291514	ENSSSCG00000038824	0.9923	8.854e-05
702	TCONS_00261208	ENSSSCG00000007836	0.9923	8.863e-05
703	TCONS_00017865	ENSSSCG00000006933	0.9923	8.902e-05
704	ENSSSCT00000066614	ENSSSCG00000028896	0.9923	8.936e-05
705	ENSSSCT00000081197	ENSSSCG00000045986	0.9923	8.954e-05
706	TCONS_00032432	ENSSSCG00000000146	-0.9923	8.971e-05
707	TCONS_00158142	ENSSSCG00000044903	0.9922	9e-05
708	TCONS_00252186	ENSSSCG00000004225	0.9922	9.005e-05
709	TCONS_00250705	ENSSSCG00000016110	0.9922	9.006e-05
710	ENSSSCT00000077323	ENSSSCG00000008927	0.9922	9.016e-05
711	TCONS_00207873	ENSSSCG00000017624	0.9922	9.07e-05
712	ENSSSCT00000088344	ENSSSCG00000028723	0.9922	9.098e-05
713	ENSSSCT00000086722	ENSSSCG00000015795	0.9922	9.101e-05
714	TCONS_00300838	ENSSSCG00000042867	0.9922	9.103e-05
715	ENSSSCT00000085840	ENSSSCG00000015795	0.9922	9.103e-05
716	TCONS_00291514	ENSSSCG00000014038	0.9922	9.111e-05
717	TCONS_00197785	ENSSSCG00000015515	0.9922	9.141e-05
718	TCONS_00261206	ENSSSCG00000030469	0.9922	9.159e-05
719	TCONS_00318412	ENSSSCG00000029311	0.9922	9.183e-05
720	ENSSSCT00000083260	ENSSSCG00000007836	0.9922	9.184e-05
721	TCONS_00318985	ENSSSCG00000033229	0.9922	9.204e-05
722	TCONS_00296586	ENSSSCG00000040770	0.9921	9.223e-05
723	ENSSSCT00000084875	ENSSSCG00000009498	0.9921	9.27e-05
724	ENSSSCT00000087691	ENSSSCG00000005753	0.9921	9.3e-05
725	ENSSSCT00000081099	ENSSSCG00000027286	0.9921	9.303e-05
726	TCONS_00132019	ENSSSCG00000038824	0.9921	9.311e-05
727	TCONS_00202736	ENSSSCG00000021176	0.9921	9.324e-05
728	ENSSSCT00000082339	ENSSSCG00000012272	0.9921	9.393e-05
729	TCONS_00144414	ENSSSCG00000043963	0.9921	9.409e-05
730	TCONS_00151368	ENSSSCG00000008140	0.9921	9.448e-05
731	TCONS_00301114	ENSSSCG00000026260	0.992	9.46e-05
732	TCONS_00219951	ENSSSCG00000006325	0.992	9.468e-05
733	TCONS_00234227	ENSSSCG00000023178	0.992	9.554e-05
734	TCONS_00132019	ENSSSCG00000022303	-0.992	9.572e-05
735	ENSSSCT00000090542	ENSSSCG00000017907	0.992	9.574e-05
736	TCONS_00149488	ENSSSCG00000027230	-0.992	9.578e-05
737	TCONS_00291514	ENSSSCG00000022126	0.992	9.602e-05
738	TCONS_00101632	ENSSSCG00000027286	0.992	9.606e-05
739	TCONS_00173059	ENSSSCG00000004480	0.992	9.617e-05
740	TCONS_00283757	ENSSSCG00000006325	0.992	9.648e-05
741	TCONS_00240274	ENSSSCG00000036046	0.992	9.666e-05
742	ENSSSCT00000072499	ENSSSCG00000016892	0.992	9.691e-05
743	TCONS_00233798	ENSSSCG00000000732	0.9919	9.711e-05
744	TCONS_00102241	ENSSSCG00000026478	0.9919	9.743e-05
745	TCONS_00232121	ENSSSCG00000010536	0.9919	9.748e-05
746	TCONS_00272792	ENSSSCG00000031557	0.9919	9.751e-05
747	TCONS_00111522	ENSSSCG00000028942	0.9919	9.753e-05
748	TCONS_00101632	ENSSSCG00000040457	0.9919	9.755e-05
749	TCONS_00065197	ENSSSCG00000010554	0.9919	9.768e-05
750	ENSSSCT00000077351	ENSSSCG00000005986	0.9919	9.768e-05
751	TCONS_00173537	ENSSSCG00000016671	0.9919	9.789e-05
752	TCONS_00252186	ENSSSCG00000034266	0.9919	9.806e-05
753	ENSSSCT00000078460	ENSSSCG00000045652	0.9919	9.807e-05
754	ENSSSCT00000087681	ENSSSCG00000015015	0.9919	9.815e-05
755	ENSSSCT00000052237	ENSSSCG00000002478	0.9919	9.821e-05
756	TCONS_00284360	ENSSSCG00000006719	0.9919	9.829e-05
757	TCONS_00219951	ENSSSCG00000004643	0.9919	9.831e-05
758	TCONS_00111522	ENSSSCG00000048009	0.9919	9.85e-05
759	TCONS_00017865	ENSSSCG00000000292	0.9918	0.0001001
760	TCONS_00140803	ENSSSCG00000028942	0.9918	0.0001005
761	TCONS_00043392	ENSSSCG00000021828	-0.9918	0.0001005
762	TCONS_00145442	ENSSSCG00000012000	0.9918	0.0001008
763	TCONS_00259004	ENSSSCG00000002857	-0.9918	0.0001013
764	ENSSSCT00000084718	ENSSSCG00000000732	-0.9918	0.0001016
765	TCONS_00174501	ENSSSCG00000051740	0.9917	0.0001019
766	ENSSSCT00000072499	ENSSSCG00000040457	0.9917	0.0001023
767	TCONS_00008058	ENSSSCG00000006325	0.9917	0.0001024
768	ENSSSCT00000081414	ENSSSCG00000010494	0.9917	0.0001027
769	ENSSSCT00000088091	ENSSSCG00000030371	0.9917	0.0001028
770	TCONS_00230769	ENSSSCG00000050530	0.9917	0.0001039
771	ENSSSCT00000040455	ENSSSCG00000042867	0.9916	0.0001045
772	ENSSSCT00000086722	ENSSSCG00000033229	0.9916	0.0001047
773	ENSSSCT00000067348	ENSSSCG00000006933	0.9916	0.0001047
774	TCONS_00158142	ENSSSCG00000051740	0.9916	0.0001049
775	ENSSSCT00000076421	ENSSSCG00000016635	0.9916	0.0001051
776	TCONS_00283757	ENSSSCG00000031557	0.9916	0.0001052
777	TCONS_00065939	ENSSSCG00000010994	0.9916	0.0001053
778	TCONS_00282098	ENSSSCG00000020859	0.9916	0.0001054
779	ENSSSCT00000079861	ENSSSCG00000040457	0.9916	0.0001059
780	TCONS_00302231	ENSSSCG00000026061	0.9916	0.0001067
781	TCONS_00064570	ENSSSCG00000010248	0.9915	0.0001069
782	TCONS_00062250	ENSSSCG00000006719	-0.9915	0.000107
783	TCONS_00284360	ENSSSCG00000017671	-0.9915	0.0001073
784	TCONS_00196211	ENSSSCG00000016671	0.9915	0.0001076
785	ENSSSCT00000072499	ENSSSCG00000004672	0.9915	0.0001077
786	TCONS_00304616	ENSSSCG00000043963	0.9915	0.000108
787	TCONS_00182796	ENSSSCG00000009270	0.9915	0.0001081
788	TCONS_00282098	ENSSSCG00000023393	0.9915	0.0001083
789	TCONS_00284360	ENSSSCG00000022126	0.9915	0.0001086
790	TCONS_00140801	ENSSSCG00000011912	0.9915	0.0001087
791	TCONS_00033154	ENSSSCG00000005354	0.9915	0.0001089
792	ENSSSCT00000074832	ENSSSCG00000028896	0.9915	0.0001089
793	TCONS_00019692	ENSSSCG00000017498	0.9915	0.0001092
794	TCONS_00318672	ENSSSCG00000032057	0.9915	0.0001093
795	ENSSSCT00000084875	ENSSSCG00000005193	0.9914	0.0001097
796	ENSSSCT00000087681	ENSSSCG00000002829	0.9914	0.0001097
797	TCONS_00091354	ENSSSCG00000001430	-0.9914	0.0001098
798	ENSSSCT00000067348	ENSSSCG00000009270	0.9914	0.0001099
799	TCONS_00138546	ENSSSCG00000010554	0.9914	0.0001099
800	TCONS_00155125	ENSSSCG00000027378	0.9914	0.0001101
801	ENSSSCT00000076984	ENSSSCG00000003998	-0.9914	0.0001101
802	ENSSSCT00000081099	ENSSSCG00000017498	0.9914	0.0001105
803	ENSSSCT00000081099	ENSSSCG00000000292	0.9914	0.0001106
804	TCONS_00297453	ENSSSCG00000015933	0.9914	0.0001107
805	ENSSSCT00000089867	ENSSSCG00000043890	0.9914	0.0001108
806	TCONS_00173059	ENSSSCG00000030209	0.9914	0.000111
807	ENSSSCT00000077287	ENSSSCG00000016153	0.9914	0.0001113
808	TCONS_00282098	ENSSSCG00000043963	0.9914	0.0001114
809	TCONS_00174501	ENSSSCG00000007836	0.9914	0.0001115
810	TCONS_00152822	ENSSSCG00000017411	0.9914	0.0001115
811	TCONS_00126361	ENSSSCG00000005753	0.9913	0.0001128
812	ENSSSCT00000071780	ENSSSCG00000022525	0.9913	0.0001129
813	TCONS_00250121	ENSSSCG00000003732	0.9913	0.0001131
814	ENSSSCT00000072303	ENSSSCG00000008927	0.9913	0.0001135
815	TCONS_00282800	ENSSSCG00000021880	0.9913	0.0001138
816	ENSSSCT00000086722	ENSSSCG00000026061	0.9913	0.0001138
817	TCONS_00300476	ENSSSCG00000051740	0.9913	0.0001139
818	ENSSSCT00000067348	ENSSSCG00000033946	0.9913	0.000114
819	TCONS_00182796	ENSSSCG00000027928	0.9913	0.0001141
820	TCONS_00297873	ENSSSCG00000023178	0.9913	0.0001143
821	TCONS_00302232	ENSSSCG00000040714	0.9912	0.0001147
822	ENSSSCT00000078460	ENSSSCG00000011625	0.9912	0.000115
823	TCONS_00093273	ENSSSCG00000031581	0.9912	0.000115
824	ENSSSCT00000090939	ENSSSCG00000013294	0.9912	0.0001157
825	TCONS_00207873	ENSSSCG00000038766	0.9912	0.0001159
826	TCONS_00173537	ENSSSCG00000007836	0.9912	0.0001159
827	TCONS_00291514	ENSSSCG00000012857	0.9912	0.0001161
828	TCONS_00282800	ENSSSCG00000011942	0.9912	0.0001163
829	ENSSSCT00000040455	ENSSSCG00000005167	0.9912	0.0001163
830	TCONS_00054349	ENSSSCG00000016737	-0.9912	0.0001165
831	TCONS_00208232	ENSSSCG00000006933	0.9912	0.0001166
832	TCONS_00259197	ENSSSCG00000005753	0.9912	0.0001168
833	TCONS_00099710	ENSSSCG00000029311	0.9912	0.0001168
834	TCONS_00207873	ENSSSCG00000027882	0.9912	0.0001169
835	TCONS_00154929	ENSSSCG00000014318	0.9912	0.0001169
836	ENSSSCT00000081116	ENSSSCG00000023393	0.9912	0.0001169
837	TCONS_00318672	ENSSSCG00000016627	0.9912	0.0001169
838	TCONS_00060668	ENSSSCG00000034373	0.9912	0.0001169
839	TCONS_00208233	ENSSSCG00000020678	0.9912	0.0001171
840	ENSSSCT00000089867	ENSSSCG00000011543	0.9911	0.0001172
841	TCONS_00058603	ENSSSCG00000010447	0.9911	0.0001172
842	TCONS_00207873	ENSSSCG00000002546	0.9911	0.0001181
843	ENSSSCT00000081099	ENSSSCG00000017502	0.9911	0.0001182
844	TCONS_00127982	ENSSSCG00000027275	0.9911	0.0001183
845	ENSSSCT00000088344	ENSSSCG00000030908	0.9911	0.0001185
846	TCONS_00121711	ENSSSCG00000005167	0.9911	0.0001186
847	TCONS_00016061	ENSSSCG00000009523	0.9911	0.0001188
848	TCONS_00230769	ENSSSCG00000035854	0.9911	0.0001189
849	TCONS_00154929	ENSSSCG00000011627	0.9911	0.000119
850	ENSSSCT00000052237	ENSSSCG00000010517	0.9911	0.0001197
851	ENSSSCT00000080518	ENSSSCG00000048009	0.9911	0.0001197
852	ENSSSCT00000069893	ENSSSCG00000036046	0.991	0.00012
853	ENSSSCT00000083231	ENSSSCG00000004075	0.991	0.0001202
854	ENSSSCT00000083231	ENSSSCG00000022525	0.991	0.0001203
855	TCONS_00060668	ENSSSCG00000017605	-0.991	0.0001203
856	TCONS_00302232	ENSSSCG00000036046	0.991	0.0001204
857	TCONS_00234227	ENSSSCG00000006771	-0.991	0.0001209
858	TCONS_00065981	ENSSSCG00000007979	0.991	0.0001215
859	ENSSSCT00000071601	ENSSSCG00000036785	0.991	0.0001215
860	TCONS_00208233	ENSSSCG00000008241	0.991	0.0001217
861	ENSSSCT00000075678	ENSSSCG00000000478	0.991	0.0001217
862	TCONS_00064570	ENSSSCG00000015911	0.991	0.0001223
863	TCONS_00140798	ENSSSCG00000032902	0.991	0.0001224
864	ENSSSCT00000083231	ENSSSCG00000003748	0.9909	0.0001226
865	TCONS_00208233	ENSSSCG00000010446	0.9909	0.0001229
866	TCONS_00136311	ENSSSCG00000048009	0.9909	0.0001233
867	ENSSSCT00000077351	ENSSSCG00000010617	0.9909	0.0001235
868	TCONS_00102143	ENSSSCG00000006569	0.9909	0.0001236
869	TCONS_00122607	ENSSSCG00000026478	0.9909	0.0001242
870	TCONS_00252186	ENSSSCG00000027378	0.9909	0.0001244
871	TCONS_00154929	ENSSSCG00000015741	0.9909	0.0001244
872	TCONS_00008058	ENSSSCG00000040130	0.9909	0.0001245
873	TCONS_00054408	ENSSSCG00000035621	0.9909	0.0001246
874	TCONS_00224182	ENSSSCG00000012326	-0.9909	0.0001247
875	TCONS_00202736	ENSSSCG00000008769	0.9909	0.0001249
876	ENSSSCT00000075678	ENSSSCG00000007286	0.9909	0.000125
877	TCONS_00132536	ENSSSCG00000046748	0.9909	0.000125
878	TCONS_00197785	ENSSSCG00000005067	0.9909	0.0001252
879	TCONS_00154929	ENSSSCG00000003748	0.9908	0.0001255
880	TCONS_00136311	ENSSSCG00000016256	0.9908	0.0001255
881	TCONS_00297873	ENSSSCG00000010535	0.9908	0.0001257
882	TCONS_00304616	ENSSSCG00000009498	0.9908	0.0001266
883	TCONS_00262379	ENSSSCG00000025794	-0.9908	0.0001269
884	TCONS_00252520	ENSSSCG00000031557	0.9908	0.0001269
885	TCONS_00262379	ENSSSCG00000030577	0.9908	0.0001271
886	ENSSSCT00000078460	ENSSSCG00000015926	0.9908	0.0001273
887	TCONS_00140815	ENSSSCG00000016635	0.9908	0.0001274
888	ENSSSCT00000079861	ENSSSCG00000017605	-0.9908	0.0001278
889	TCONS_00109243	ENSSSCG00000034373	0.9908	0.0001278
890	TCONS_00230769	ENSSSCG00000015862	0.9908	0.0001279
891	TCONS_00054349	ENSSSCG00000024263	-0.9908	0.0001279
892	TCONS_00219951	ENSSSCG00000040130	0.9907	0.0001281
893	TCONS_00256285	ENSSSCG00000000732	-0.9907	0.0001282
894	ENSSSCT00000076984	ENSSSCG00000020970	0.9907	0.0001287
895	TCONS_00227721	ENSSSCG00000027928	0.9907	0.000129
896	TCONS_00140808	ENSSSCG00000044903	0.9907	0.0001292
897	ENSSSCT00000072245	ENSSSCG00000035789	0.9907	0.0001293
898	TCONS_00138546	ENSSSCG00000025108	0.9907	0.0001296
899	TCONS_00291514	ENSSSCG00000017671	-0.9907	0.00013
900	ENSSSCT00000089505	ENSSSCG00000046748	0.9907	0.0001306
901	TCONS_00250121	ENSSSCG00000035967	-0.9906	0.0001309
902	TCONS_00058865	ENSSSCG00000006933	0.9906	0.0001313
903	TCONS_00208232	ENSSSCG00000004191	0.9906	0.0001313
904	TCONS_00109243	ENSSSCG00000010447	0.9906	0.0001315
905	TCONS_00296593	ENSSSCG00000016239	0.9906	0.0001317
906	TCONS_00065981	ENSSSCG00000026052	0.9906	0.0001321
907	TCONS_00145442	ENSSSCG00000013736	0.9906	0.0001324
908	TCONS_00234841	ENSSSCG00000021176	0.9906	0.0001326
909	TCONS_00182796	ENSSSCG00000015862	0.9906	0.0001327
910	ENSSSCT00000078460	ENSSSCG00000012324	-0.9906	0.0001327
911	TCONS_00261208	ENSSSCG00000026061	0.9905	0.0001336
912	TCONS_00318672	ENSSSCG00000016671	0.9905	0.000134
913	TCONS_00302232	ENSSSCG00000015903	0.9905	0.0001342
914	TCONS_00109243	ENSSSCG00000017578	0.9905	0.0001346
915	TCONS_00208232	ENSSSCG00000020678	0.9905	0.0001348
916	TCONS_00261206	ENSSSCG00000022945	0.9905	0.0001349
917	TCONS_00145442	ENSSSCG00000013436	0.9905	0.0001349
918	TCONS_00100915	XLOC_111627	0.9905	0.000135
919	TCONS_00247860	ENSSSCG00000005753	0.9905	0.0001351
920	TCONS_00158142	ENSSSCG00000029311	0.9905	0.0001351
921	ENSSSCT00000078460	ENSSSCG00000000528	0.9905	0.0001359
922	ENSSSCT00000082834	ENSSSCG00000007836	0.9905	0.000136
923	TCONS_00227721	ENSSSCG00000008241	0.9905	0.0001362
924	ENSSSCT00000084875	ENSSSCG00000051740	0.9905	0.0001363
925	TCONS_00292325	ENSSSCG00000037262	0.9904	0.0001365
926	ENSSSCT00000072852	ENSSSCG00000012272	0.9904	0.0001365
927	TCONS_00214071	ENSSSCG00000029902	0.9904	0.0001366
928	ENSSSCT00000083210	ENSSSCG00000026478	0.9904	0.0001367
929	ENSSSCT00000084718	ENSSSCG00000011795	-0.9904	0.0001369
930	TCONS_00208233	ENSSSCG00000009270	0.9904	0.000137
931	TCONS_00204260	ENSSSCG00000017421	0.9904	0.0001372
932	TCONS_00175321	ENSSSCG00000037032	0.9904	0.0001374
933	TCONS_00234841	ENSSSCG00000025108	0.9904	0.0001375
934	TCONS_00281166	ENSSSCG00000048009	0.9904	0.0001376
935	ENSSSCT00000081099	ENSSSCG00000001518	0.9904	0.0001377
936	TCONS_00304616	ENSSSCG00000015903	0.9904	0.0001377
937	TCONS_00214071	ENSSSCG00000005164	0.9904	0.0001378
938	TCONS_00240274	ENSSSCG00000028896	0.9904	0.0001384
939	TCONS_00126361	ENSSSCG00000017502	0.9904	0.0001386
940	TCONS_00096398	ENSSSCG00000048477	0.9904	0.000139
941	TCONS_00224182	ENSSSCG00000039245	0.9903	0.0001394
942	TCONS_00140808	ENSSSCG00000022525	0.9903	0.0001395
943	TCONS_00207873	ENSSSCG00000007979	0.9903	0.0001396
944	ENSSSCT00000078460	ENSSSCG00000042867	0.9903	0.0001398
945	TCONS_00254780	ENSSSCG00000008959	-0.9903	0.0001398
946	ENSSSCT00000040455	ENSSSCG00000016156	0.9903	0.0001405
947	TCONS_00182795	ENSSSCG00000034373	0.9903	0.000141
948	TCONS_00126361	ENSSSCG00000000292	0.9903	0.0001414
949	TCONS_00089981	ENSSSCG00000040457	0.9903	0.0001414
950	TCONS_00182795	ENSSSCG00000012326	-0.9903	0.0001421
951	TCONS_00252186	ENSSSCG00000013339	-0.9902	0.0001427
952	ENSSSCT00000089505	ENSSSCG00000033229	0.9902	0.0001427
953	TCONS_00281166	ENSSSCG00000010903	0.9902	0.0001436
954	ENSSSCT00000072245	ENSSSCG00000026061	0.9902	0.000144
955	ENSSSCT00000078460	ENSSSCG00000010554	0.9902	0.000144
956	TCONS_00252186	ENSSSCG00000028217	-0.9902	0.0001443
957	TCONS_00144414	ENSSSCG00000005193	0.9902	0.0001447
958	TCONS_00062250	ENSSSCG00000012857	-0.9902	0.0001449
959	TCONS_00196211	ENSSSCG00000032057	0.9901	0.0001451
960	TCONS_00065939	ENSSSCG00000015015	0.9901	0.0001456
961	TCONS_00290219	ENSSSCG00000022945	0.9901	0.0001456
962	TCONS_00140803	ENSSSCG00000015903	0.9901	0.0001464
963	TCONS_00054408	ENSSSCG00000046241	0.9901	0.0001478
964	TCONS_00140803	ENSSSCG00000005193	0.9901	0.0001479
965	ENSSSCT00000083231	ENSSSCG00000040714	0.99	0.0001486
966	TCONS_00282098	ENSSSCG00000017411	0.99	0.000149
967	ENSSSCT00000090939	ENSSSCG00000027378	0.99	0.0001491
968	ENSSSCT00000069893	ENSSSCG00000030371	0.99	0.0001491
